# Supplementary material for: A combined experimental and theoretical rationalization of an unusual zinc(ii)-mediated conversion of 18-membered Schiff-base macrocycles to 18-membered imine–amine macrocycles with imidazolidine side rings: an investigation of their bio-relevant catalytic activities
Source: Royal Society of Chemistry journal article supplement (doi:10.1039/d0nj05635a), 2021-01-01
Supplement: d0nj05635a1.pdf [file d0nj05635a1.pdf]

## Electronic Supplementary Information

### Combined experimental and theoretical rationalization on zinc(II) mediated unusual conversion of 18-membered Schiff-base macrocycle to 18-membered imine-amine macrocycle having imidazolidine side rings: investigation of their bio-relevant catalytic activities

Tonmoy Chakraborty,<sup>a</sup> Somali Mukherjee,<sup>a</sup> Rumana Parveen,<sup>a</sup> Arpita Chandra,<sup>b</sup> Debabrata Samanta,<sup>c</sup> and Debasis Das\*<sup>a</sup>

<sup>a</sup> Department of Chemistry, University of Calcutta, 92 A. P. C. Road, Kolkata 700009, India.

<sup>b</sup> In Vitro Carcinogenesis and Cellular Chemotherapy, Chittaranjan National Cancer Institute, Kolkata-700026, India.

<sup>c</sup> Department of Chemistry, Dukhulal Nibaran Chandra College, Aurangabad West Bengal - 742201, India.

E-mail: [dasdebasis2001@yahoo.com](mailto:dasdebasis2001@yahoo.com)

| Contents of the Supporting Information                                                                                                                             | Page No.  |
|--------------------------------------------------------------------------------------------------------------------------------------------------------------------|-----------|
| <b>Fig. S1</b> PXRD pattern of simulated complex <b>1</b> , as synthesized <b>1</b> collected under air.                                                           | <b>S3</b> |
| <b>Fig. S2</b> PXRD pattern of simulated complex <b>2</b> , as synthesized <b>2</b> collected under air.                                                           | <b>S3</b> |
| <b>Fig. S3</b> FT-IR Spectrum of Ligand ( <b>H<sub>2</sub>L</b> ).                                                                                                 | <b>S4</b> |
| <b>Fig. S4</b> FT-IR Spectrum of complex <b>1</b> .                                                                                                                | <b>S4</b> |
| <b>Fig. S5</b> FT-IR Spectrum of complex <b>2</b> .                                                                                                                | <b>S5</b> |
| <b>Fig. S6</b> UV-Vis spectrum of ligand <b>H<sub>2</sub>L</b> and complex ( <b>1-2</b> ) in DMF medium at 25 °C (zoom out) in the wavelength range of 250-500 nm. | <b>S5</b> |
| <b>Fig. S7</b> UV-Vis spectrum of ligand <b>H<sub>2</sub>L</b> and complex ( <b>1-2</b> ) in DMF medium at 25 °C (zoom in) in the wavelength range of 320-500 nm.  | <b>S6</b> |
| <b>Fig. S8</b> <sup>1</sup> H-NMR spectra of ligand <b>H<sub>2</sub>L</b> in CDCl <sub>3</sub> .                                                                   | <b>S6</b> |
| <b>Fig. S9</b> <sup>13</sup> C-NMR spectra of ligand <b>H<sub>2</sub>L</b> in CDCl <sub>3</sub> .                                                                  | <b>S7</b> |
| <b>Fig. S10</b> <sup>1</sup> H-NMR spectra of complex <b>1</b> in <i>d</i> <sub>6</sub> -DMSO.                                                                     | <b>S7</b> |

|                                                                                                                                                                                                                                                                                                                                 |                |
|---------------------------------------------------------------------------------------------------------------------------------------------------------------------------------------------------------------------------------------------------------------------------------------------------------------------------------|----------------|
| <b>Fig. S11</b> $^{13}\text{C}$ -NMR spectra of complex <b>1</b> in $d_6$ -DMSO.                                                                                                                                                                                                                                                | <b>S8</b>      |
| <b>Fig. S12</b> $^1\text{H}$ -NMR spectra of complex <b>2</b> in $d_6$ -DMSO.                                                                                                                                                                                                                                                   | <b>S8</b>      |
| <b>Fig. S13</b> $^{13}\text{C}$ -NMR spectra of complex <b>2</b> in $d_6$ -DMSO.                                                                                                                                                                                                                                                | <b>S9</b>      |
| <b>Fig. S14</b> ESI-MS spectra of complex <b>2</b> , inset shows the theoretical simulation and the differences in spacing for the dipositive moiety in solution state.                                                                                                                                                         | <b>S11</b>     |
| <b>Fig. S15</b> Wavelength scan of ligand ( <b>H<sub>2</sub>L</b> ) and upon the addition of 4-PNPP observed after each 5 min interval                                                                                                                                                                                          | <b>S12</b>     |
| <b>Fig. S16</b> Absorption profile on addition of 4-PNPP to complex <b>2</b> due to the formation of p-nitrophenolate ( $\lambda_{\text{max}} = 426 \text{ nm}$ ) studied for 2 h (Least-squares fit, $R^2 = 0.998$ ). Inset shows the plot of $\log [A_{\infty}/(A_{\infty} - A_t)]$ versus time for 50 min ( $R^2 = 0.993$ ). | <b>S12</b>     |
| <b>Fig. S17</b> ESI-MS spectra of reaction mixture of complex <b>1</b> and 4-PNPP recorded at $25^\circ\text{C}$ .                                                                                                                                                                                                              | <b>S13</b>     |
| <b>Fig. S18</b> ESI-MS spectra of reaction mixture of complex <b>2</b> and 4-PNPP recorded at $25^\circ\text{C}$ .                                                                                                                                                                                                              | <b>S13</b>     |
| <b>Fig. S19</b> UV-Vis spectrum of complex <b>1</b> at 0 hour and after 72 hours (stability of complex with time) in DMSO medium ( $\lambda_{\text{max}} \sim 365 \text{ nm}$ ) at $25^\circ\text{C}$ .                                                                                                                         | <b>S14</b>     |
| <b>Fig. S20</b> UV-Vis spectrum of complex <b>2</b> at 0 hour and after 72 hours (stability of complex with time) in DMSO medium at $25^\circ\text{C}$ .                                                                                                                                                                        | <b>S14</b>     |
| <b>Fig. S21</b> Fluorescence spectrum of complex <b>1</b> at 0 hour and after 72 hours (stability of complex with time) in DMSO medium excited at 448 nm ( $\lambda_{\text{max}} \sim 475 \text{ nm}$ ) at $25^\circ\text{C}$ .                                                                                                 | <b>S15</b>     |
| <b>Fig. S22</b> Fluorescence spectrum of complex <b>2</b> at 0 hour and after 72 hours (stability of complex with time) in DMSO medium excited at 452 nm ( $\lambda_{\text{max}} \sim 503 \text{ nm}$ ) at $25^\circ\text{C}$ .                                                                                                 | <b>S15</b>     |
| <b>Table S1</b> Coordination bond lengths ( $\text{\AA}$ ) and angles ( $^\circ$ ) for complex <b>1</b> .                                                                                                                                                                                                                       | <b>S9</b>      |
| <b>Table S2</b> Coordination bond lengths ( $\text{\AA}$ ) and angles ( $^\circ$ ) for complex <b>2</b> .                                                                                                                                                                                                                       | <b>S10</b>     |
| <b>Table S3</b> Selected hydrogen bonding distances ( $\text{\AA}$ ) and angles (deg) for the complex <b>1</b> .                                                                                                                                                                                                                | <b>S10</b>     |
| <b>Table S4</b> Selected hydrogen bonding distances ( $\text{\AA}$ ) and angles (deg) for the complex <b>2</b> .                                                                                                                                                                                                                | <b>S11</b>     |
| <b>Table S5</b> First-order rate constants for the hydrolysis of various phosphate esters by previously reported dinuclear $\text{Zn}^{\text{II}}$ complexes.                                                                                                                                                                   | <b>S16</b>     |
| <b>References</b>                                                                                                                                                                                                                                                                                                               | <b>S17</b>     |
| <b>XYZ Coordinates</b>                                                                                                                                                                                                                                                                                                          | <b>S17-S34</b> |

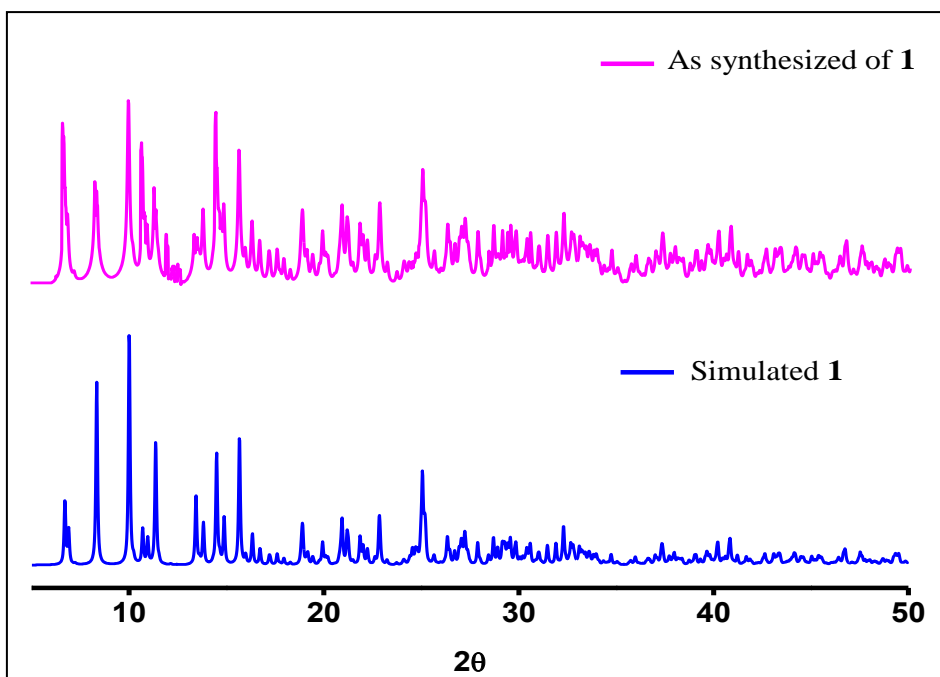

**Fig. S1** PXRD pattern of simulated complex **1**, as synthesized **1** collected under air.

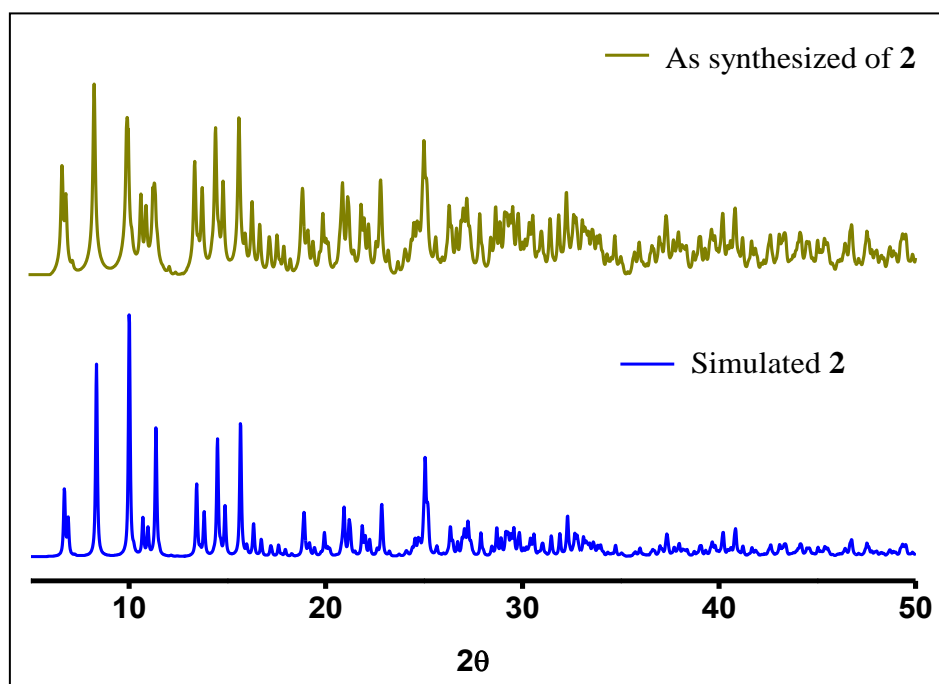

**Fig. S2** PXRD pattern of simulated complex **2**, as synthesized **2** collected under air.

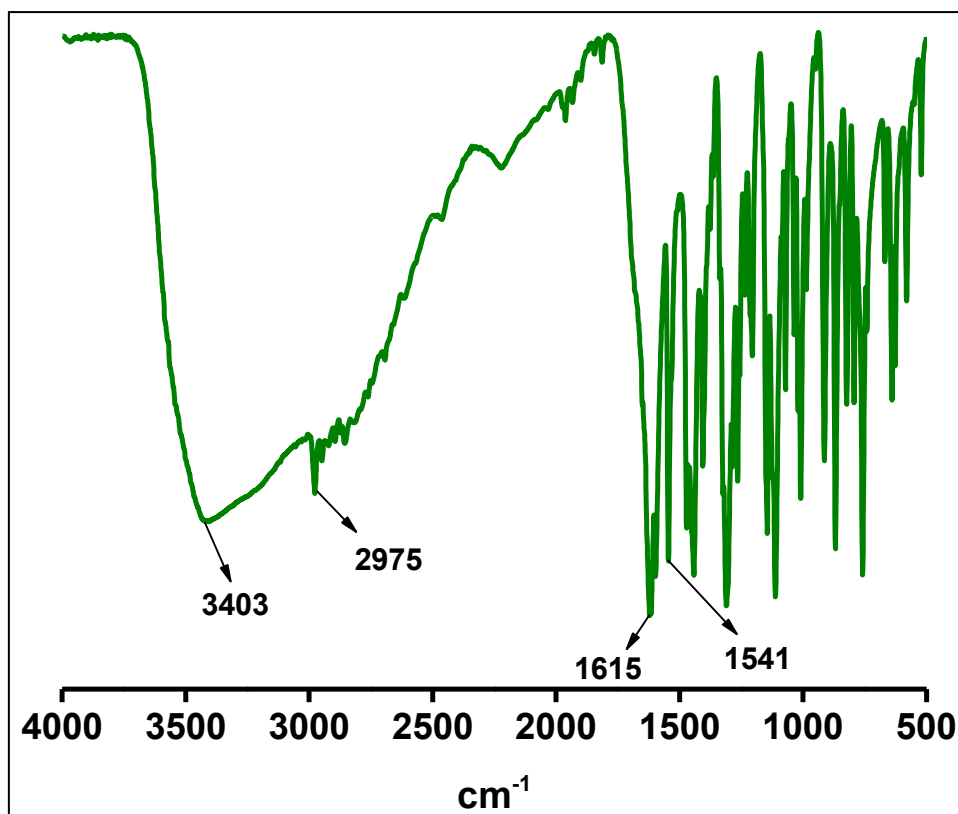

Fig. S3 FT-IR Spectrum of Ligand (H<sub>2</sub>L).

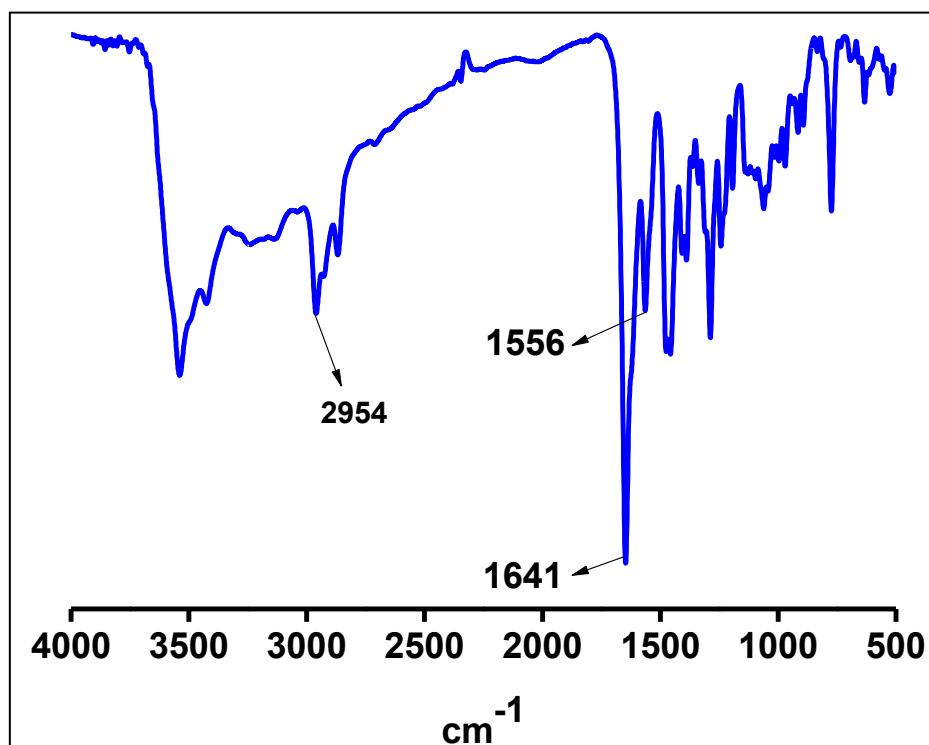

Fig. S4 FT-IR Spectrum of complex 1.

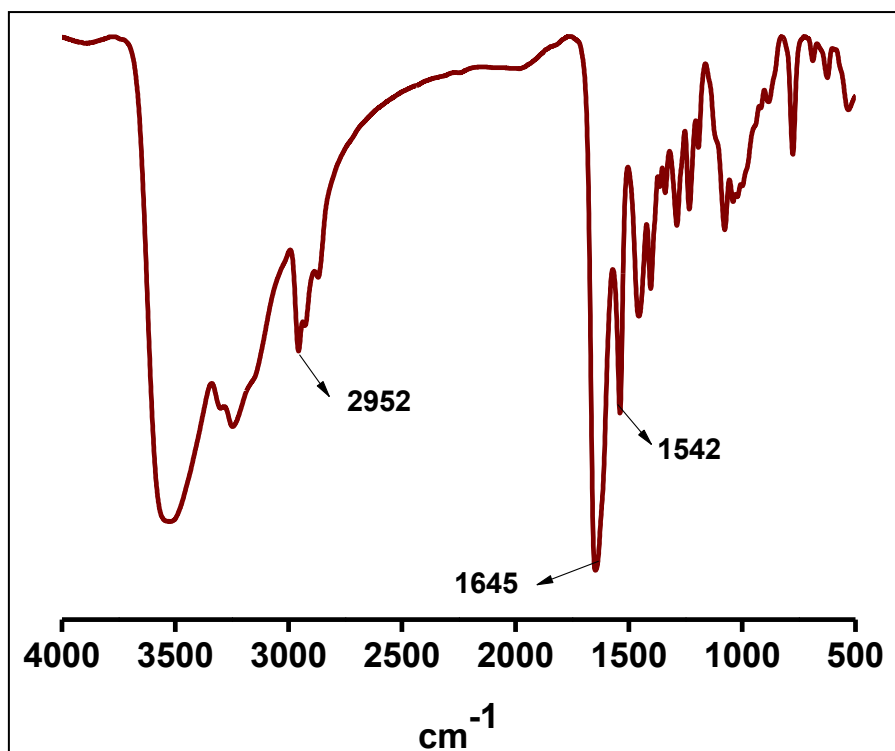

Fig. S5 FT-IR Spectrum of complex 2.

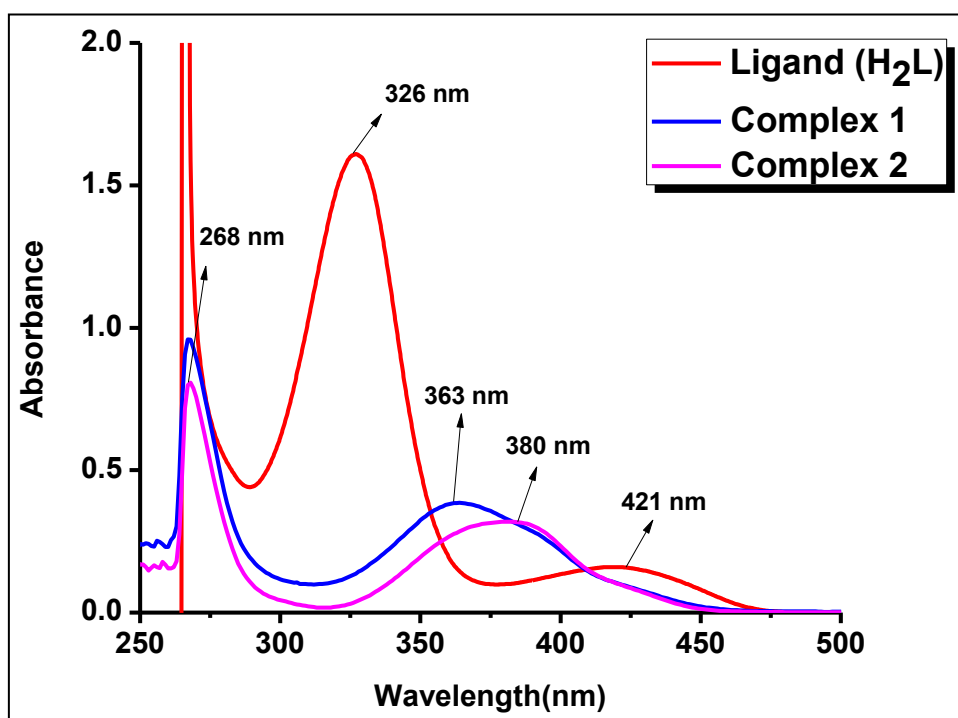

Fig. S6 UV-Vis spectrum of ligand  $\text{H}_2\text{L}$  and complex (1-2) in DMF medium at 25 °C (zoom out) in the wavelength range of 250-500 nm.

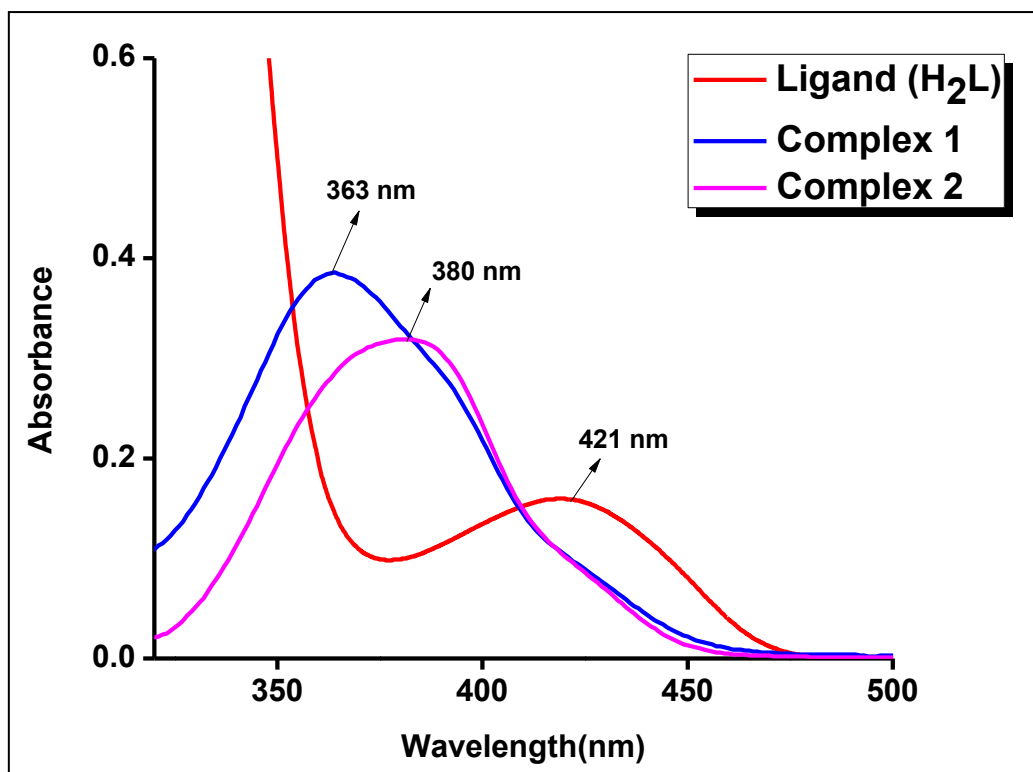

**Fig. S7** UV-Vis spectrum of ligand  $H_2L$  and complex (1-2) in DMF medium at 25 °C (zoom in) in the wavelength range of 320-500 nm.

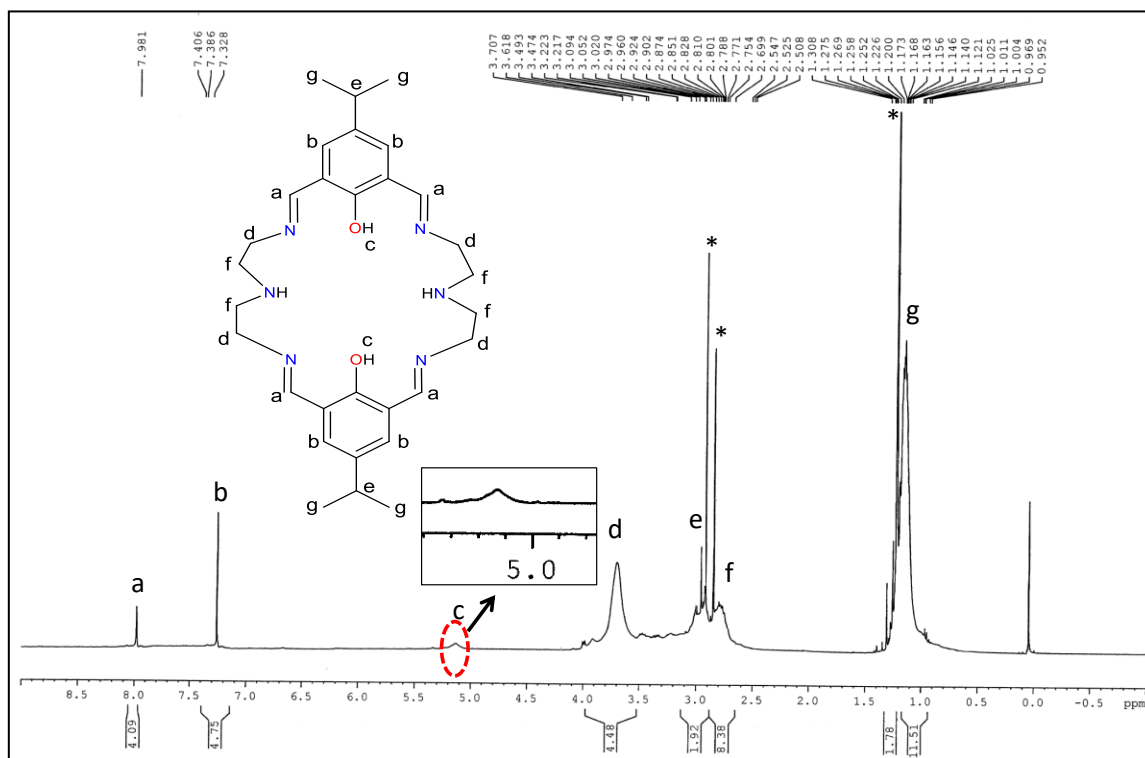

**Fig. S8**  $^1H$ -NMR spectra of ligand  $H_2L$  in  $CDCl_3$ .

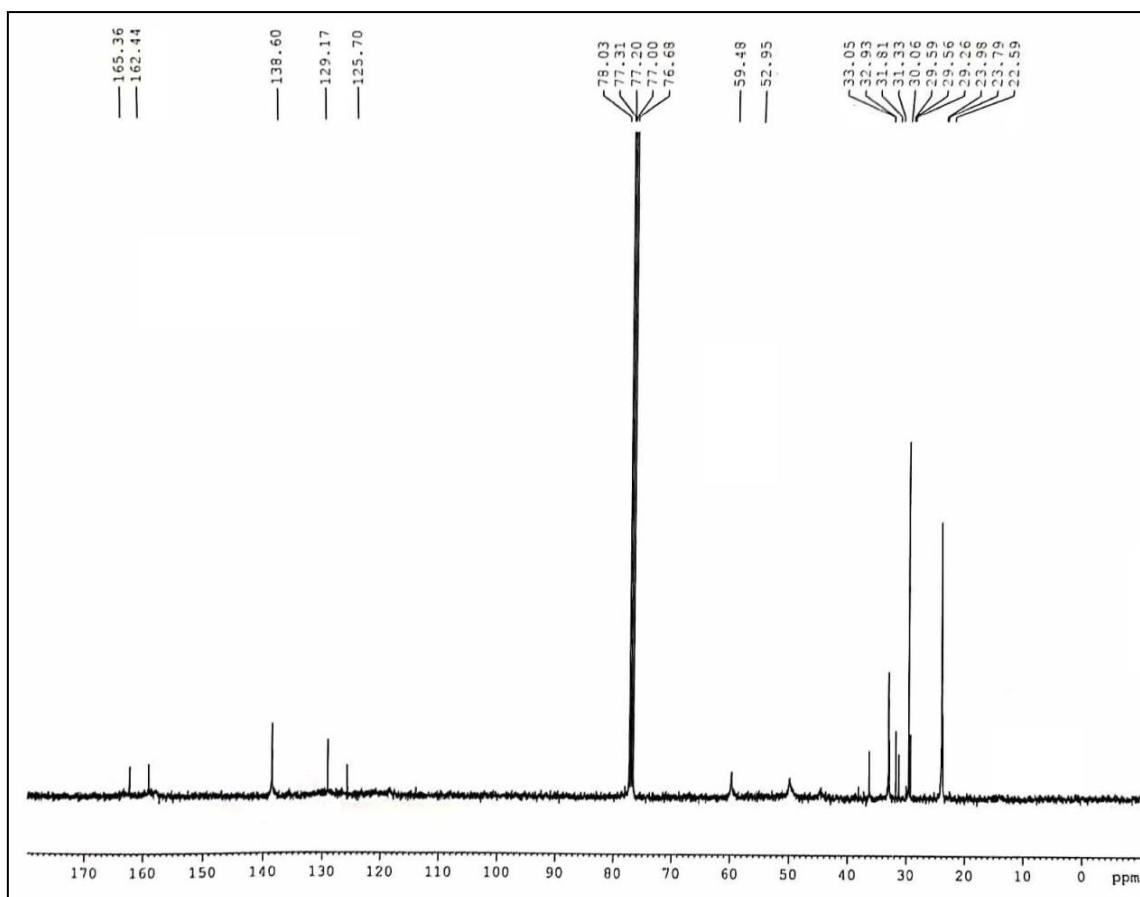

Fig. S9  $^{13}\text{C}$ -NMR spectra of ligand  $\text{H}_2\text{L}$  in  $\text{CDCl}_3$ .

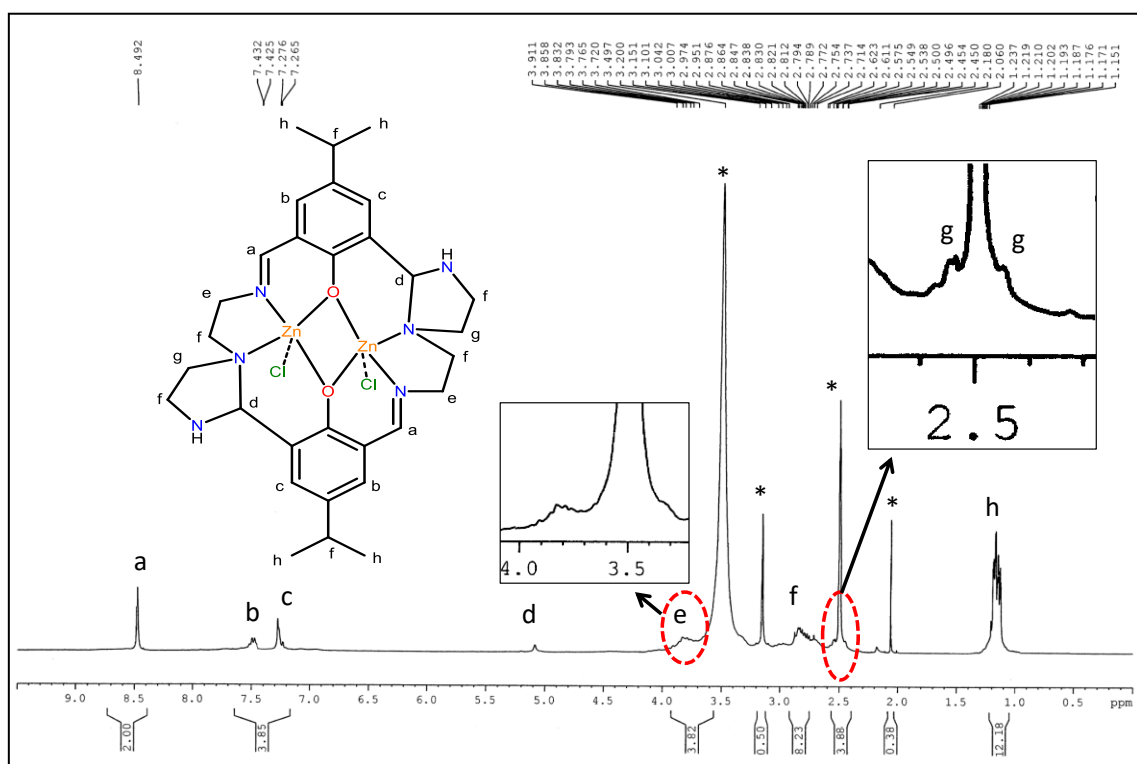

Fig. S10  $^1\text{H}$ -NMR spectra of complex **1** in  $d_6$ -DMSO.

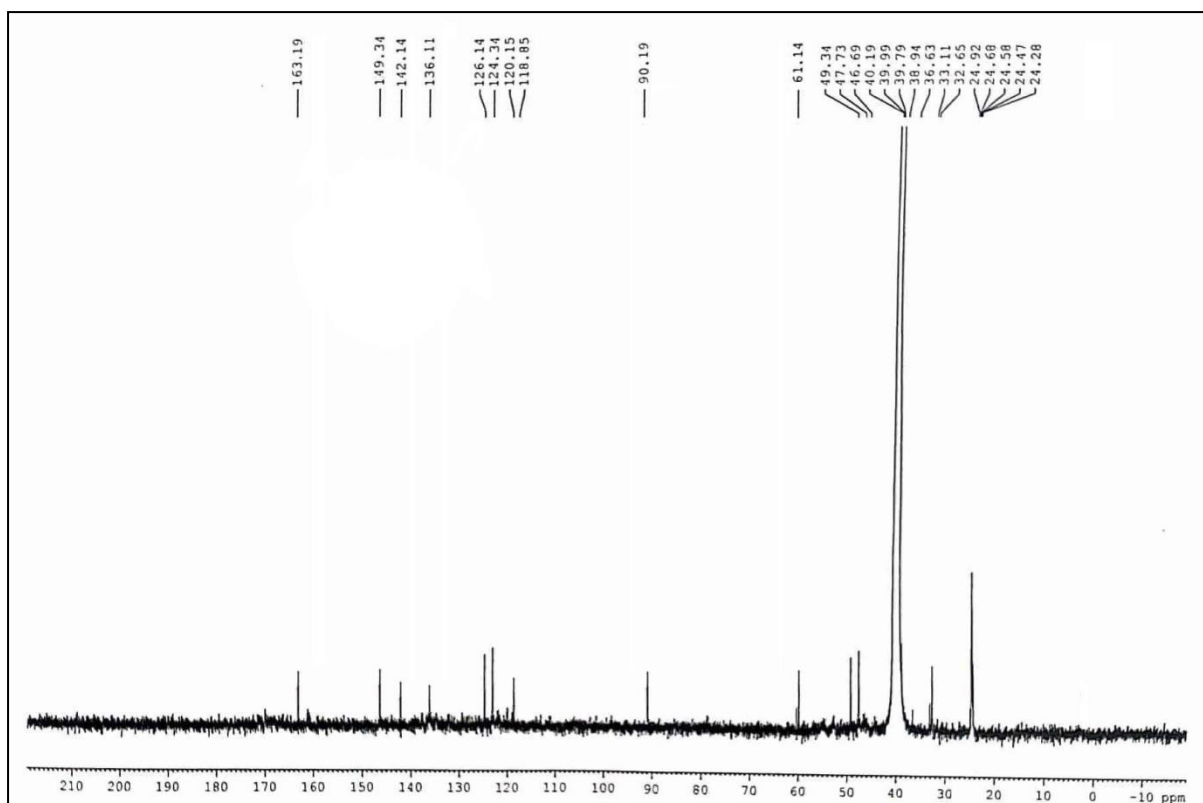

Fig. S11  $^{13}\text{C}$ -NMR spectra of complex **1** in  $d_6$ -DMSO.

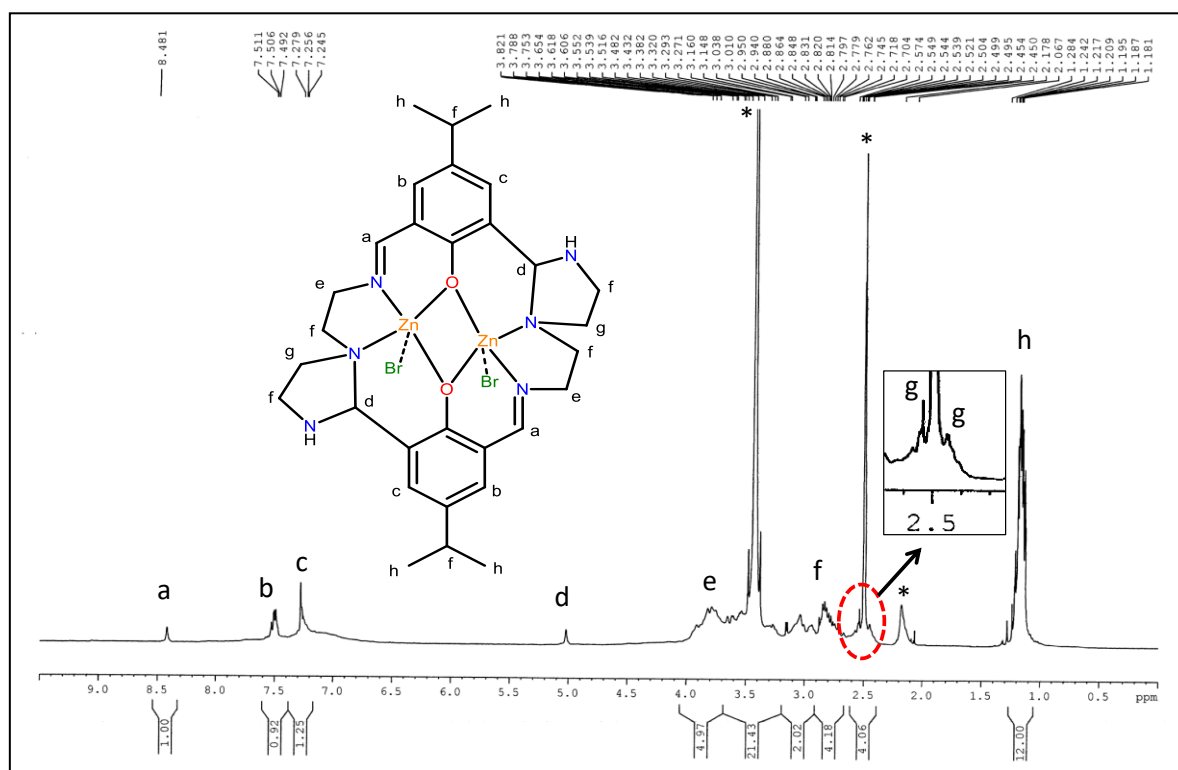

Fig. S12  $^1\text{H}$ -NMR spectra of complex **2** in  $d_6$ -DMSO.



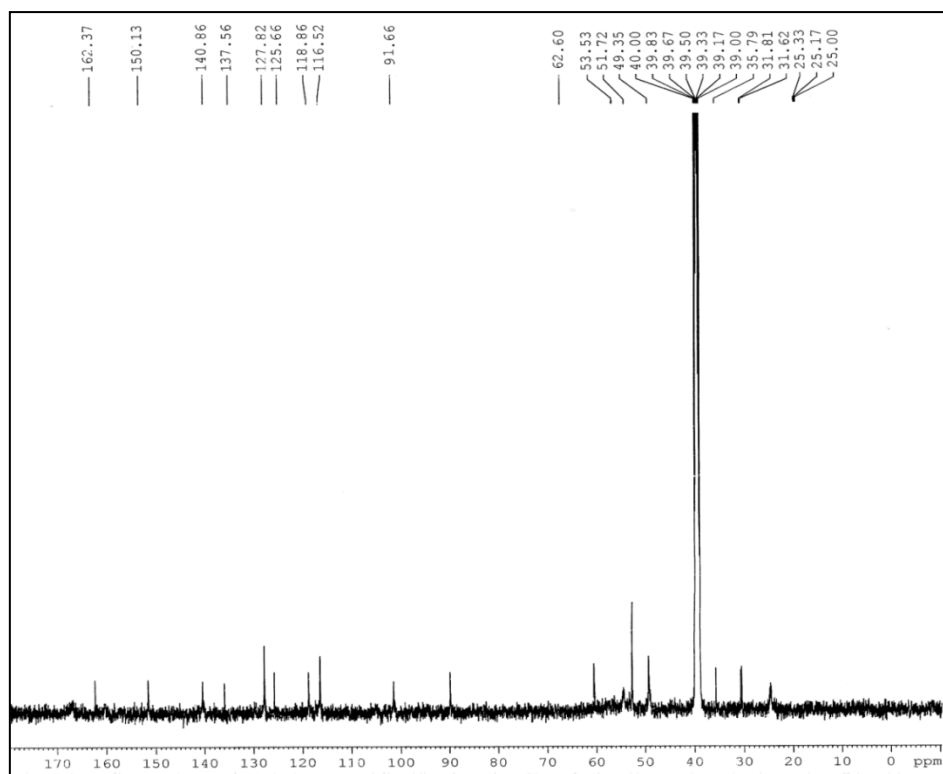

**Fig. S13**  $^{13}\text{C}$ -NMR spectra of complex **2** in  $d_6$ -DMSO.

**Table S1** Coordination bond lengths ( $\text{\AA}$ ) and angles ( $^\circ$ ) for complex **1**.

| Bond Distance ( $\text{\AA}$ ) |            |                 |            |
|--------------------------------|------------|-----------------|------------|
| Zn1 – Cl1                      | 2.2427(16) | Zn2 – Cl2       | 2.2463(15) |
| Zn1 – O1                       | 2.022(3)   | Zn2 – N4        | 2.003(3)   |
| Zn1 – O2                       | 2.148(3)   | Zn2 – N5        | 2.264(3)   |
| Zn1 – N1                       | 2.213(3)   | Zn3 – Cl3       | 2.2729(19) |
| Zn1 – N2                       | 2.026(3)   | Zn3 – Cl5       | 2.2407(16) |
| Zn2 – O1                       | 2.149(3)   | Zn3 – Cl4       | 2.214(2)   |
| Zn2 – O2                       | 2.011(3)   | Zn3 – N3        | 2.096(3)   |
| Bond Angles ( $^\circ$ )       |            |                 |            |
| Cl1 – Zn1 – O1                 | 113.30(7)  | N1 – Zn1 – N2   | 82.29(12)  |
| Cl1 – Zn1 – O2                 | 97.35(7)   | N4 – Zn2 – N5   | 81.40(11)  |
| Cl1 – Zn1 – N1                 | 104.32(8)  | Cl2 – Zn2 – O1  | 99.60(7)   |
| Cl1 – Zn1 – N2                 | 117.40(8)  | Cl2 – Zn2 – O2  | 115.31(7)  |
| O1 – Zn1 – O2                  | 81.74(11)  | Cl2 – Zn2 – N4  | 119.45(10) |
| O1 – Zn1 – N1                  | 90.35(11)  | Cl2 – Zn2 – N5  | 100.84(9)  |
| O1 – Zn1 – N2                  | 129.04(10) | O1 – Zn2 – O2   | 81.96(10)  |
| O2 – Zn1 – N1                  | 158.32(10) | O1 – Zn2 – N4   | 88.33(11)  |
| O1 – Zn2 – N5                  | 159.55(10) | Cl3 – Zn3 – Cl4 | 109.58(7)  |
| O2 – Zn2 – N4                  | 125.24(12) | Cl3 – Zn3 – Cl5 | 108.21(5)  |
| O2 – Zn2 – N5                  | 89.57(11)  | Cl3 – Zn3 – N3  | 104.02(9)  |
| O2 – Zn1 – N2                  | 87.09(11)  | Cl4 – Zn3 – Cl5 | 112.80(7)  |
| Cl4 – Zn3 – N3                 | 106.19(11) | Zn1 – O2 – Zn2  | 94.52(12)  |
| Cl5 – Zn3 – N3                 | 115.60(9)  | Zn1 – O1 – Zn2  | 94.18(11)  |

**Table S2** Coordination bond lengths (Å) and angles (°) for complex **2**.

| Bond Distance (Å) |            |                 |            |
|-------------------|------------|-----------------|------------|
| Zn1 – Br1         | 2.3730(18) | Zn1 – N1        | 2.235(8)   |
| Zn2 – Br2         | 2.3864(18) | Zn1 – N2        | 2.035(7)   |
| Zn1 – O1          | 2.016(6)   | Zn2 – O2        | 2.007(6)   |
| Zn1 – O2          | 2.171(6)   | Zn2 – N4        | 2.006(7)   |
| Zn2 – O1          | 2.169(6)   | Zn2 – N5        | 2.282(8)   |
| Zn3 – Br3         | 2.379(2)   | Zn3 – Br5       | 2.411(2)   |
| Zn3 – Br4         | 2.348(2)   | Zn3 – N3        | 2.079(9)   |
| Bond Angles (°)   |            |                 |            |
| Br1 – Zn1 – O1    | 115.24(16) | O2 – Zn1 – N2   | 86.6(3)    |
| Br1 – Zn1 – O2    | 98.35(15)  | N1 – Zn1 – N2   | 82.4(3)    |
| Br1 – Zn1 – N1    | 103.98(18) | Br2 – Zn2 – O1  | 100.32(16) |
| Br1 – Zn1 – N2    | 115.57(19) | Br2 – Zn2 – O2  | 116.95(16) |
| O1 – Zn1 – O2     | 81.5(2)    | Br2 – Zn2 – N4  | 118.1(2)   |
| O1 – Zn1 – N1     | 90.3(2)    | Br2 – Zn2 – N5  | 101.30(15) |
| O1 – Zn1 – N2     | 128.9(2)   | O1 – Zn2 – O2   | 81.8(2)    |
| O2 – Zn1 – N1     | 157.6(2)   | O1 – Zn2 – N4   | 88.1(3)    |
| O1 – Zn2 – N5     | 158.4(2)   | Br3 – Zn3 – Br4 | 112.08(7)  |
| O2 – Zn2 – N4     | 124.9(3)   | Br3 – Zn3 – Br5 | 108.16(6)  |
| O2 – Zn2 – N5     | 89.1(2)    | Br3 – Zn3 – N3  | 116.3(2)   |
| N4 – Zn2 – N5     | 81.1(3)    | Br4 – Zn3 – Br5 | 109.78(7)  |
| Br4 – Zn3 – N3    | 105.6(2)   | Zn1 – O2 – Zn2  | 94.3(2)    |
| Br5 – Zn3 – N3    | 104.5(2)   | Zn1 – O1 – Zn2  | 94.1(2)    |

**Table S3** Selected hydrogen bonding distances (Å) and angles (deg) for the complex **1**.

| D-H...A          | Symmetry    | D-H(Å) | D...A(Å) | A...H(Å) | <D-H-A(deg) |
|------------------|-------------|--------|----------|----------|-------------|
| O1 -- H1...Cl2   | 1-x,1-y,-z  | 0.8500 | 3.349(3) | 2.6100   | 146.00      |
| O1 -- H1...Cl1   | x, y, z     | 0.8500 | 3.202(4) | 2.3500   | 177.00      |
| N3 -- H3...O4    | x, y, z     | 0.9800 | 2.962(6) | 2.0300   | 157.00      |
| O4 -- H4...Cl2   | x, y, z     | 0.8200 | 3.238(5) | 2.4900   | 153.00      |
| O4 -- H4...O1    | x, y, z     | 0.8200 | 3.067(5) | 2.5800   | 120.00      |
| N6 -- H6...O1    | x, y, z     | 0.8900 | 2.736(5) | 1.8800   | 160.00      |
| N6 -- H6...Cl3   | x,-1+y,z    | 0.8900 | 3.327(5) | 2.5300   | 150.00      |
| C10 -- H10...O4  | 1-x,1-y,1-z | 0.9300 | 3.496(6) | 2.5800   | 169.00      |
| C14 -- H14...Cl4 | x,-1+y,z    | 0.9700 | 3.594(7) | 2.7600   | 145.00      |
| C14 -- H14...Cl2 | x, y, z     | 0.9700 | 3.460(6) | 2.7800   | 127.00      |
| C15 -- H15...Cl5 | x,-1+y,z    | 0.9800 | 3.629(5) | 2.6700   | 165.00      |

**Table S4** Selected hydrogen bonding distances (Å) and angles (deg) for the complex **2**.

| D-H...A          | Symmetry    | D-H(Å) | D...A(Å)  | A...H(Å) | <D-H-A(deg) |
|------------------|-------------|--------|-----------|----------|-------------|
| N3 -- H3...O3    | x, y, z     | 0.9800 | 2.989(12) | 2.0600   | 158.00      |
| O3 -- H3...Br2   | x, y, z     | 0.8200 | 3.357(11) | 2.6000   | 154.00      |
| O4 -- H4...Br2   | 1-x,1-y,2-z | 0.8500 | 3.505(8)  | 2.8000   | 142.00      |
| O4 -- H4...Br1   | x, y, z     | 0.8500 | 3.335(10) | 2.4900   | 177.00      |
| N6 -- H6...Br5   | x,1+y,z     | 0.8900 | 3.514(10) | 2.7200   | 149.00      |
| N6 -- H6...O4    | x, y, z     | 0.8900 | 2.747(12) | 1.8900   | 161.00      |
| C14 -- H14...Br2 | x, y, z     | 0.9700 | 3.562(12) | 2.8600   | 130.00      |
| C14 -- H14...Br4 | x,1+y,z     | 0.9700 | 3.688(12) | 2.8400   | 147.00      |
| C15 -- H15...Br3 | x,1+y,z     | 0.9800 | 3.745(11) | 2.8000   | 163.00      |

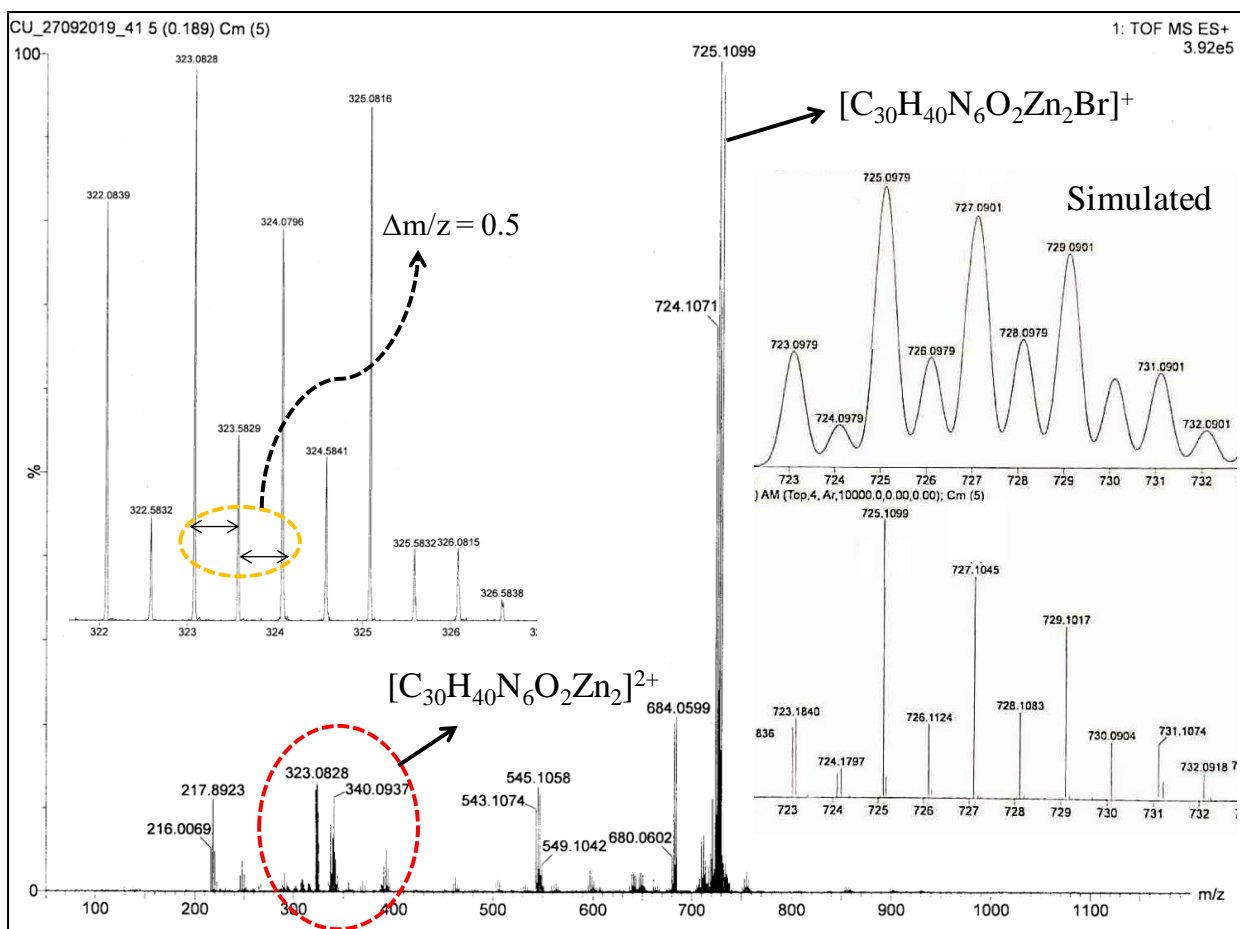

**Fig. S14** ESI-MS spectra of complex **2**, inset shows the theoretical simulation and the differences in spacing for the dipositive moiety in solution state.

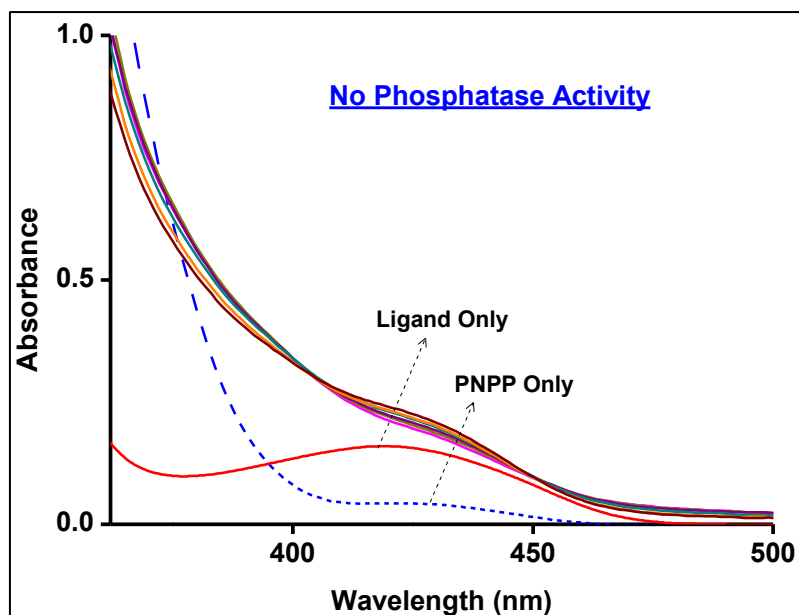

**Fig. S15** Wavelength scan of ligand (**H<sub>2</sub>L**) and upon the addition of 4-PNPP observed after each 5 min interval.

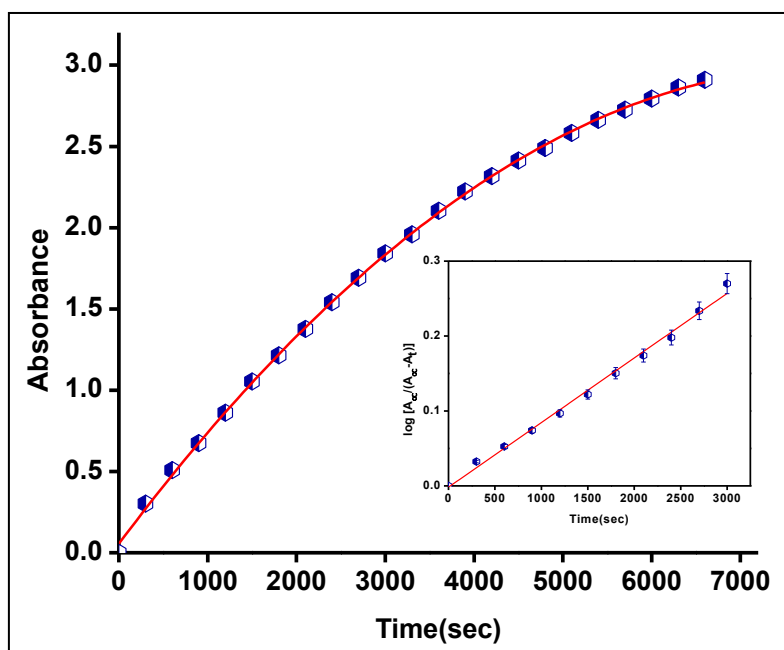

**Fig. S16** Absorption profile on addition of 4-PNPP to complex **2** due to the formation of p-nitrophenolate ( $\lambda_{\text{max}} = 426 \text{ nm}$ ) studied for 2 h (Least-squares fit,  $R^2 = 0.998$ ). Inset shows the plot of  $\log [A_{\infty}/(A_{\infty} - A_t)]$  versus time for 50 min ( $R^2 = 0.993$ ).

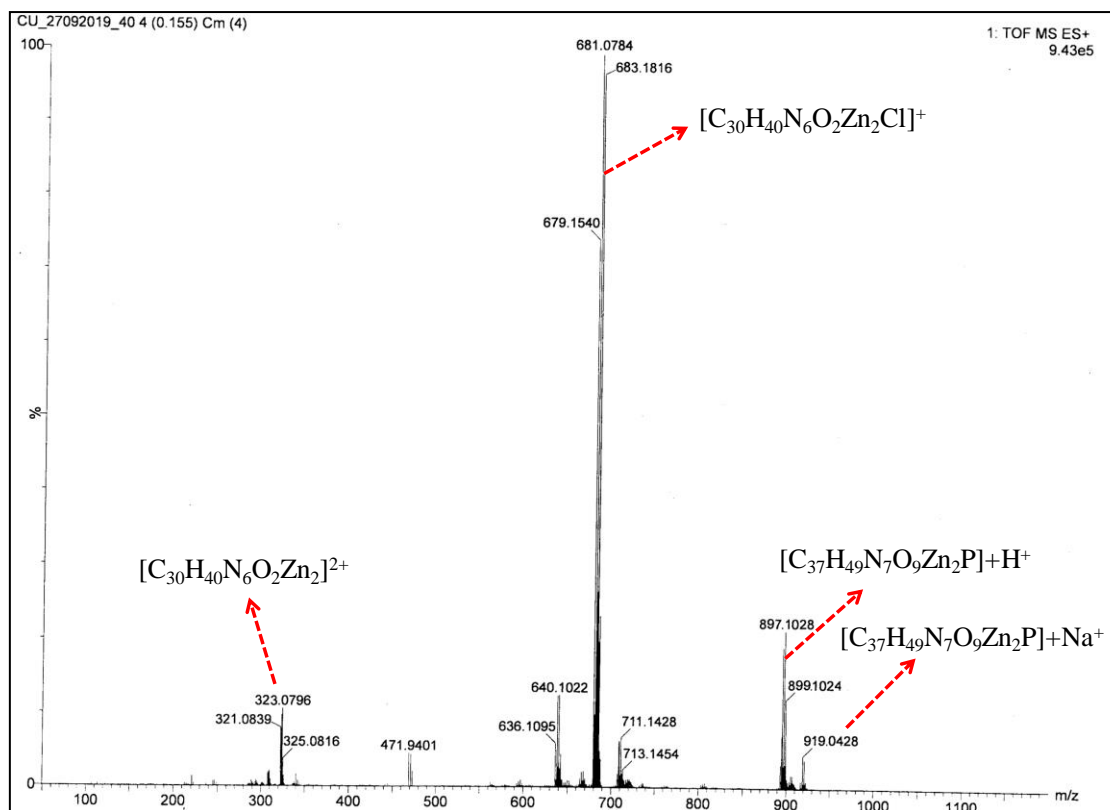

**Fig. S17** ESI-MS spectra of reaction mixture of complex **1** and 4-PNPP recorded at 25°C.

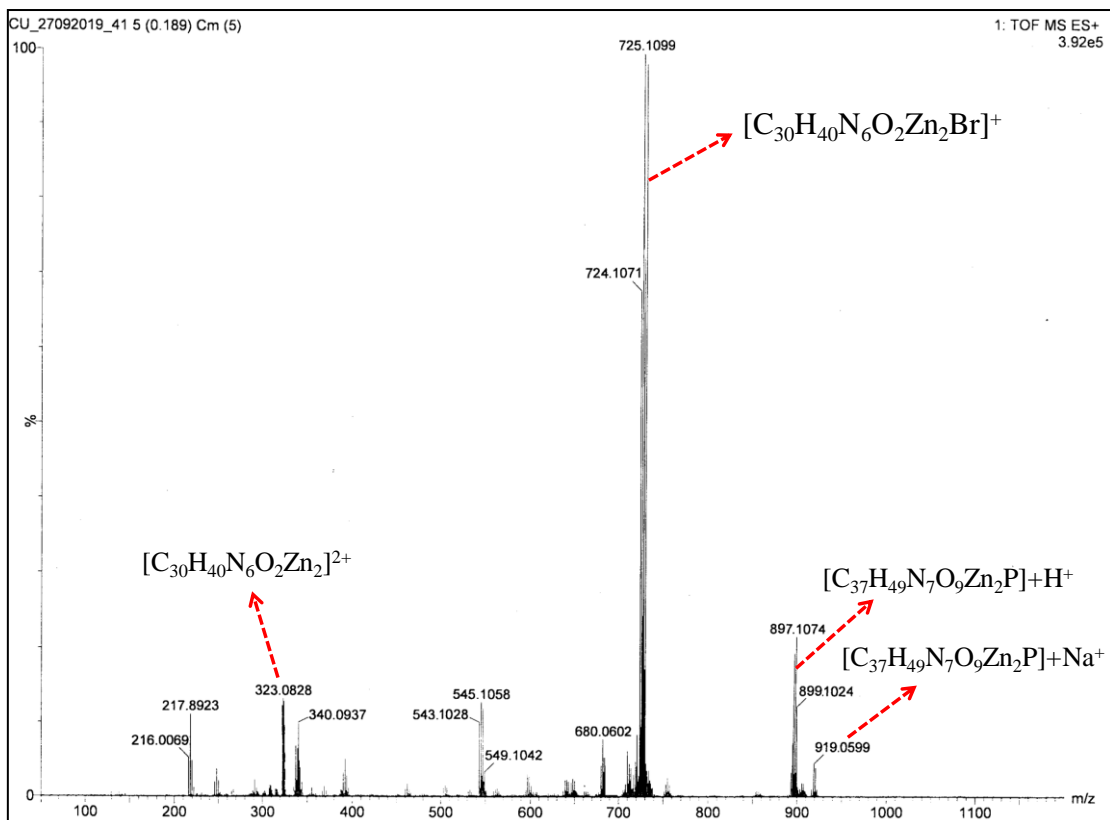

**Fig. S18** ESI-MS spectra of reaction mixture of complex **2** and 4-PNPP recorded at 25°C.

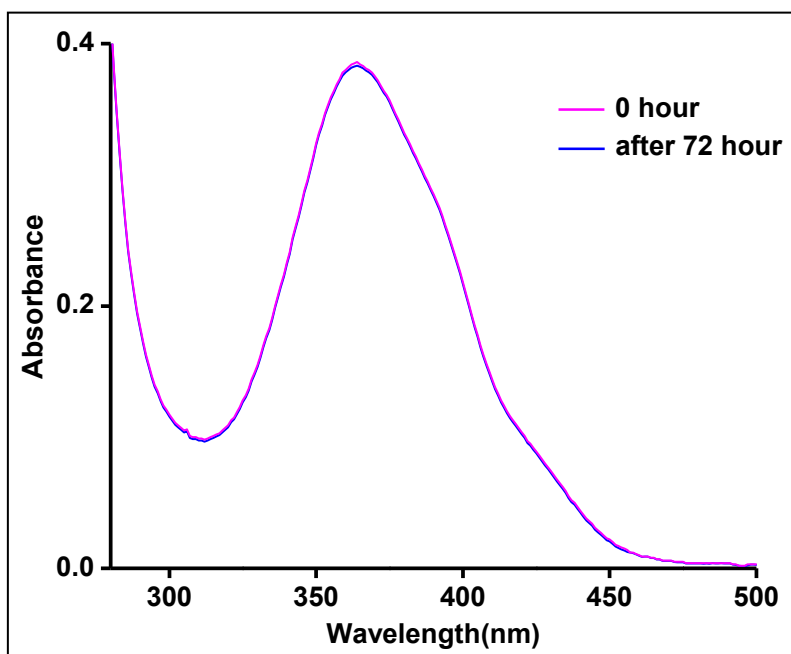

**Fig. S19** UV-Vis spectrum of complex **1** at 0 hour and after 72 hours (stability of complex with time) in DMSO medium ( $\lambda_{\text{max}} \sim 365$  nm) at 25°C.

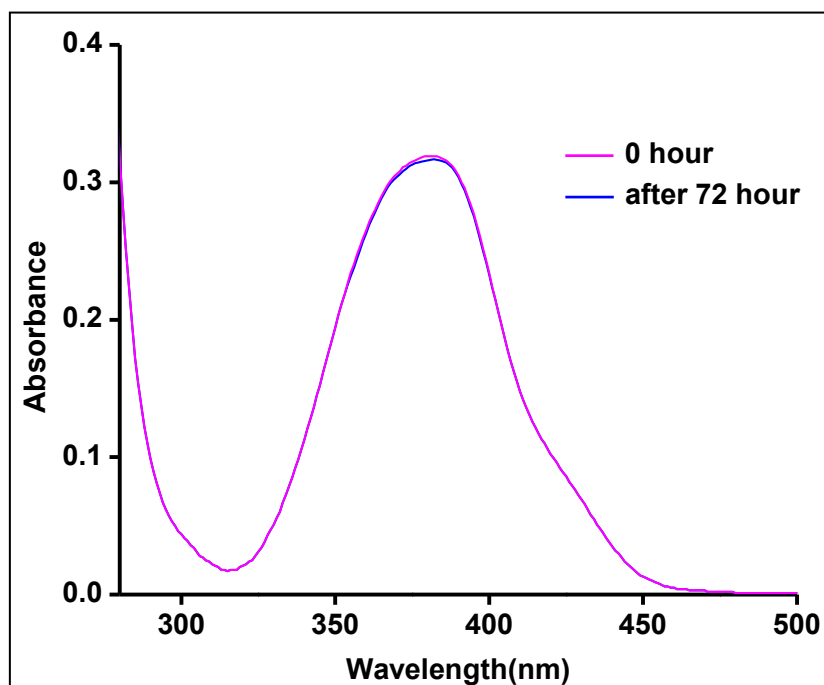

**Fig. S20** UV-Vis spectrum of complex **2** at 0 hour and after 72 hours (stability of complex with time) in DMSO medium ( $\lambda_{\text{max}} \sim 379$  nm) at 25°C.

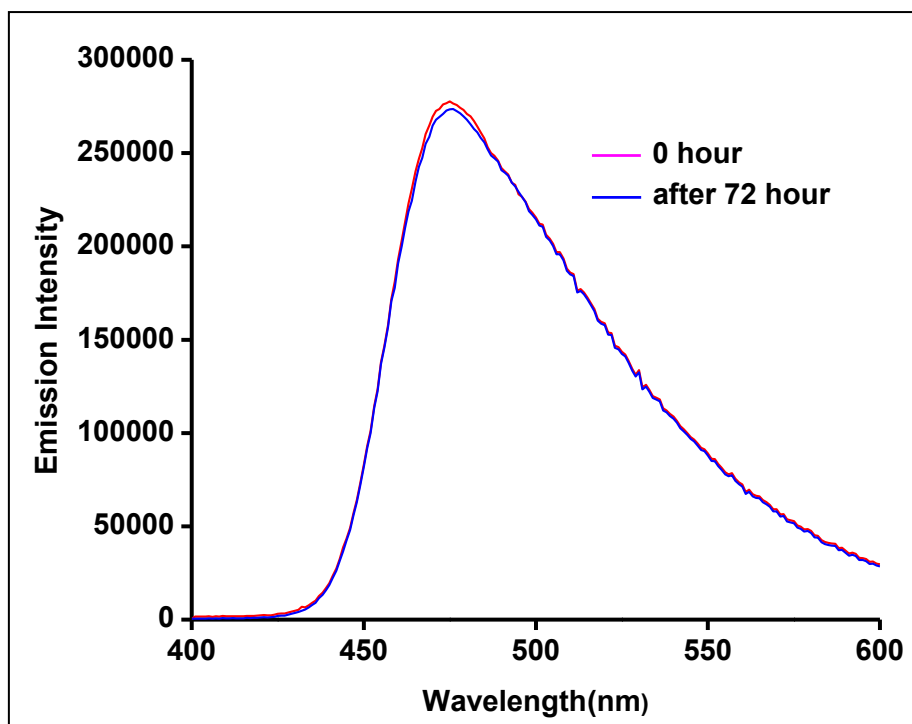

**Fig. S21** Fluorescence spectrum of complex **1** at 0 hour and after 72 hours (stability of complex with time) in DMSO medium excited at 448 nm ( $\lambda_{\text{max}} \sim 475$  nm) at 25°C.

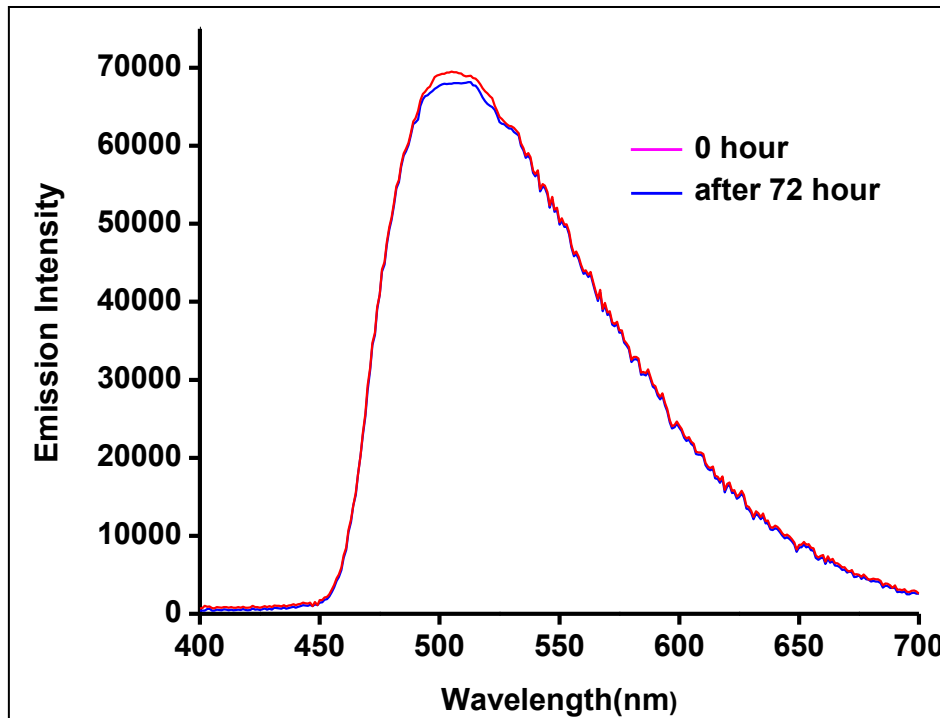

**Fig. S22** Fluorescence spectrum of complex **2** at 0 hour and after 72 hours (stability of complex with time) in DMSO medium excited at 452 nm ( $\lambda_{\text{max}} \sim 503$  nm) at 25°C.

**Table S5** First-order rate constants for the hydrolysis of various phosphate esters by previously reported dinuclear Zn<sup>II</sup> complexes.<sup>a</sup>

| Catalyst                                                                                                                     | Substrate | Solvent                              | $k_{cat}(s^{-1})$     | Ref                  |
|------------------------------------------------------------------------------------------------------------------------------|-----------|--------------------------------------|-----------------------|----------------------|
| [Zn <sub>2</sub> L]                                                                                                          | 4-PNPP    | MeCN/H <sub>2</sub> O                | 476–203               | 1                    |
| [Zn <sub>2</sub> L <sub>1</sub> <sup>2</sup> X <sub>2</sub> ], X= Cl, Br, I                                                  | 4-PNPP    | DMF-H <sub>2</sub> O<br>(97.5%, v/v) | 9.35-8.33             | 2                    |
| [Zn <sub>2</sub> L <sub>2</sub> X <sub>2</sub> ], X= Cl, Br, I                                                               | 4-PNPP    | DMF-H <sub>2</sub> O<br>(97.5%, v/v) | 9.97-11.62            | 3                    |
| [Zn <sub>2</sub> (L <sub>1</sub> ) <sub>2</sub> Cl <sub>2</sub> ]                                                            | 4-PNPP    | DMF-H <sub>2</sub> O<br>(97.5%, v/v) | 8.94                  | 4                    |
| [Zn <sub>2</sub> (L <sub>1</sub> ) <sub>2</sub> Br <sub>2</sub> ]                                                            | 4-PNPP    | DMF-H <sub>2</sub> O<br>(97.5%, v/v) | 13.06                 | 4                    |
| [Zn <sub>2</sub> (L <sub>2</sub> ) <sub>2</sub> (Cl) <sub>2</sub> ]                                                          | 4-PNPP    | DMF-H <sub>2</sub> O<br>(97.5%, v/v) | 5.5                   | 5                    |
| [Zn <sup>II</sup> <sub>2</sub> (L <sup>2</sup> )-(μ-O <sub>2</sub> CMe) <sub>2</sub> (MeCN) <sub>2</sub> ][PF <sub>6</sub> ] | HPNP      | MeOH/H <sub>2</sub> O<br>(33%, v/v)  | 3.44×10 <sup>-4</sup> | 6                    |
| [Zn <sub>2</sub> (L <sub>2H</sub> )(AcO)(H <sub>2</sub> O)][PF <sub>6</sub> ] 0.2H <sub>2</sub> O                            | BNPP      | MeOH/H <sub>2</sub> O<br>(1:5)       | 4.60×10 <sup>-6</sup> | 7                    |
| [Zn <sub>2</sub> complex]                                                                                                    | HPNP      | DMSO/buffered<br>water (1:1)         | 4.00×10 <sup>-7</sup> | 8                    |
| [Zn <sub>2</sub> PBTPA] <sup>+</sup>                                                                                         | BNPP      | 30% DMSO                             | 2.30×10 <sup>-8</sup> | 9                    |
| [Zn <sub>3</sub> (L <sup>1</sup> )(X) <sub>5</sub> ](CH <sub>3</sub> OH)(H <sub>2</sub> O)<br>[Where, X = Cl, Br]            | 4-PNPP    | DMF-H <sub>2</sub> O<br>(97.5%, v/v) | 14.23-17.9            | <b>This<br/>Work</b> |

<sup>a</sup>BNPP = bis(4 nitrophenyl)phosphate, 4-PNPP = 4-nitrophenyl-phosphate, HPNP = 2-hydroxypropyl(4-nitrophenyl)phosphate.



## References

- (1) S. Anbu, S. Kamalraj, B. Varghese, J. Muthumary, M. Kandaswamy, *Inorg. Chem.* 2012, **51**, 5580-5592.
- (2) R. Sanyal, A. Guha, T. Ghosh, T. K. Mondal, E. Zangrando, D. Das, *Inorg. Chem.* 2014, **53**, 85-96.
- (3) R. Sanyal, X. Zhang, P. Kundu, T. Chattopadhyay, C. Zhao, F. A. Mautner, D. Das, *Inorg. Chem.* 2015, **54**, 2315-2324.
- (4) R. Sanyal, P. Chakraborty, E. Zangrando, D. Das, *Polyhedron.* 2015, **97**, 55-65.
- (5) M. Sheoran, K. Bhar, T. Khan, A. K. Sharma, *J. Chem. Sci.* 2018, **130**, 108.
- (6) H. Arora, S. K. Barman, F. Lloret, R. N. Mukherjee, *Inorg. Chem.* 2012, **51**, 5539-5553.
- (7) J. Chen, X. Wang, Y. Zhu, J. Lin, X. Yang, Y. Li, Y. Lu, Z. Guo, *Inorg. Chem.* 2005, **44**, 3422-3430.
- (8) L. V. Penkova, A. Macia, E. V. Rybak-Akimova, M. Haukka, V. A. Pavlenko, T. S. Iskenderov, H. Kozzowski, F. Meyer, I. O. Fritsky, *Inorg. Chem.* 2009, **48**, 6960-6971.
- (9) L. Zhu, O. Santos, C. W. Koo, M. Rybstein, L. Pape, J. W. Canary, *Inorg. Chem.* 2003, **42**, 7912-7920.

## XYZ Coordinates

### H<sub>2</sub>L

Charge = 0, multiplicity = 1, Nimag = 0, HF = -1647.4594288 a.u.

|   |             |              |              |
|---|-------------|--------------|--------------|
| C | 4.779806000 | -1.477829000 | 0.263149000  |
| C | 6.096590000 | -1.467644000 | -0.207391000 |
| C | 6.905756000 | -0.323900000 | -0.210583000 |
| C | 6.320394000 | 0.868870000  | 0.211259000  |
| C | 4.995876000 | 0.928879000  | 0.671331000  |
| C | 4.221130000 | -0.268886000 | 0.751147000  |
| H | 6.505372000 | -2.399308000 | -0.596311000 |
| H | 6.889836000 | 1.795618000  | 0.166185000  |
| C | 8.346210000 | -0.378415000 | -0.697818000 |
| H | 8.550883000 | -1.416738000 | -0.992990000 |
| C | 8.566230000 | 0.507058000  | -1.938043000 |
| H | 9.594308000 | 0.410890000  | -2.307005000 |
| H | 7.882033000 | 0.230452000  | -2.747525000 |
| H | 8.396099000 | 1.564776000  | -1.702913000 |

|   |              |              |              |
|---|--------------|--------------|--------------|
| C | 9.336242000  | -0.011515000 | 0.422820000  |
| H | 9.204252000  | -0.661255000 | 1.294649000  |
| H | 10.371801000 | -0.106360000 | 0.074792000  |
| H | 9.188540000  | 1.024005000  | 0.753078000  |
| O | 2.962884000  | -0.251322000 | 1.194002000  |
| H | 2.742420000  | 0.705390000  | 1.407995000  |
| C | 4.361816000  | 2.226201000  | 0.888203000  |
| H | 4.931709000  | 3.115218000  | 0.575189000  |
| C | 3.944049000  | -2.683186000 | 0.076157000  |
| H | 4.152112000  | -3.242987000 | -0.854965000 |
| C | 2.400591000  | 3.556862000  | 1.241515000  |
| H | 3.033221000  | 4.434264000  | 1.027587000  |
| H | 1.869688000  | 3.729370000  | 2.183724000  |
| C | 1.361872000  | 3.310120000  | 0.128539000  |
| H | 1.017247000  | 2.279765000  | 0.267562000  |
| H | 1.876554000  | 3.323472000  | -0.850001000 |
| C | 2.057051000  | -4.031652000 | 0.429251000  |
| H | 2.249884000  | -4.413337000 | -0.588924000 |
| H | 2.086699000  | -4.881335000 | 1.126074000  |
| C | 0.678509000  | -3.352590000 | 0.483540000  |
| H | 0.771538000  | -2.389861000 | -0.033236000 |
| H | 0.456545000  | -3.111470000 | 1.539063000  |
| N | 3.162748000  | 2.325448000  | 1.337011000  |
| N | 3.003816000  | -3.018938000 | 0.863653000  |
| N | 0.173947000  | 4.164989000  | 0.173630000  |
| H | 0.385641000  | 5.075155000  | -0.234286000 |
| N | -0.390582000 | -4.103469000 | -0.179569000 |
| H | -0.473957000 | -5.026585000 | 0.246573000  |
| C | -1.657695000 | -3.385392000 | -0.029499000 |
| C | -2.755559000 | -3.812367000 | -1.021266000 |
| H | -2.065644000 | -3.423253000 | 0.996955000  |
| H | -1.451511000 | -2.327075000 | -0.230705000 |
| H | -3.039693000 | -4.859703000 | -0.865038000 |
| H | -2.361236000 | -3.712666000 | -2.044710000 |
| N | -3.912109000 | -2.952103000 | -0.760786000 |
| C | -3.872785000 | -1.806548000 | -1.325957000 |
| C | -4.764646000 | -0.700878000 | -0.934441000 |
| H | -3.087068000 | -1.542566000 | -2.046416000 |
| C | -5.949063000 | -0.905350000 | -0.225537000 |
| C | -4.295093000 | 0.620103000  | -1.123151000 |
| C | -6.681301000 | 0.151030000  | 0.339120000  |
| H | -6.276212000 | -1.932664000 | -0.093100000 |
| C | -4.953493000 | 1.694443000  | -0.461665000 |
| O | -3.176113000 | 0.810885000  | -1.839137000 |
| C | -6.141425000 | 1.431847000  | 0.243993000  |

|   |              |              |              |
|---|--------------|--------------|--------------|
| C | -7.981160000 | -0.104992000 | 1.087038000  |
| C | -4.255802000 | 2.966335000  | -0.305740000 |
| H | -2.960629000 | 1.793179000  | -1.778046000 |
| H | -6.637481000 | 2.260403000  | 0.747675000  |
| H | -8.358115000 | 0.868359000  | 1.431217000  |
| C | -9.050731000 | -0.718977000 | 0.165536000  |
| C | -7.756622000 | -0.983787000 | 2.331437000  |
| H | -4.589861000 | 3.616312000  | 0.517242000  |
| N | -3.213814000 | 3.249899000  | -1.003211000 |
| H | -9.996058000 | -0.854779000 | 0.704299000  |
| H | -9.237779000 | -0.079555000 | -0.704083000 |
| H | -8.732466000 | -1.701102000 | -0.203919000 |
| H | -7.020133000 | -0.532895000 | 3.005477000  |
| H | -8.693466000 | -1.119571000 | 2.885021000  |
| H | -7.387419000 | -1.977123000 | 2.050688000  |
| C | -2.255365000 | 4.257965000  | -0.576749000 |
| H | -2.474823000 | 4.659574000  | 0.424245000  |
| H | -2.242918000 | 5.092537000  | -1.290650000 |
| C | -0.903941000 | 3.519267000  | -0.574689000 |
| H | -0.636473000 | 3.297602000  | -1.625474000 |
| H | -1.080297000 | 2.548123000  | -0.098037000 |

### Int1

**Charge = 0, multiplicity = 1, Nimag = 0, HF = -2633.6370152 a.u.**

|   |              |              |              |
|---|--------------|--------------|--------------|
| C | -0.212011000 | 0.347972000  | -1.686584000 |
| C | 0.579258000  | 1.514054000  | -1.550866000 |
| C | 0.013194000  | 2.755912000  | -1.315572000 |
| C | -1.377253000 | 2.787460000  | -1.043477000 |
| C | -2.197949000 | 1.668973000  | -1.130627000 |
| C | -1.658489000 | 0.439189000  | -1.678673000 |
| H | 1.661434000  | 1.439148000  | -1.639215000 |
| H | -1.824427000 | 3.720839000  | -0.707032000 |
| C | 0.859178000  | 4.019633000  | -1.350799000 |
| H | 1.901327000  | 3.711342000  | -1.192954000 |
| C | 0.779064000  | 4.677270000  | -2.743409000 |
| H | 1.423677000  | 5.562998000  | -2.795524000 |
| H | 1.089133000  | 3.977734000  | -3.527085000 |
| H | -0.248697000 | 4.991226000  | -2.963100000 |
| C | 0.504027000  | 5.039671000  | -0.256181000 |
| H | 0.502457000  | 4.586278000  | 0.741521000  |
| H | 1.227618000  | 5.862352000  | -0.255217000 |
| H | -0.485471000 | 5.481696000  | -0.422000000 |
| O | -2.383140000 | -0.529646000 | -2.065921000 |
| C | -3.530174000 | 1.718661000  | -0.541844000 |
| H | -3.893327000 | 2.713512000  | -0.253528000 |
| C | 0.267954000  | -0.980029000 | -1.650136000 |

|   |              |              |              |
|---|--------------|--------------|--------------|
| H | -0.469445000 | -1.763512000 | -1.792944000 |
| C | -5.429591000 | 0.834444000  | 0.567565000  |
| H | -6.227108000 | 0.269886000  | 0.072423000  |
| H | -5.715675000 | 1.891772000  | 0.652684000  |
| C | -5.207391000 | 0.247071000  | 1.974451000  |
| H | -5.016274000 | -0.835343000 | 1.883437000  |
| H | -6.149301000 | 0.358083000  | 2.523040000  |
| C | 1.833146000  | -2.778708000 | -1.072440000 |
| H | 1.885522000  | -2.894291000 | 0.013655000  |
| H | 1.014292000  | -3.411178000 | -1.423968000 |
| C | 3.175654000  | -3.179029000 | -1.698109000 |
| H | 3.911796000  | -2.397014000 | -1.483193000 |
| H | 3.074670000  | -3.230076000 | -2.792651000 |
| N | -4.221349000 | 0.680359000  | -0.230900000 |
| N | 1.487677000  | -1.382042000 | -1.369416000 |
| N | -4.140606000 | 0.947245000  | 2.700018000  |
| H | -4.393548000 | 1.012154000  | 3.683152000  |
| N | 3.636665000  | -4.439694000 | -1.114248000 |
| H | 3.463067000  | -5.212711000 | -1.745888000 |
| C | 5.018800000  | -4.470925000 | -0.633246000 |
| C | 5.158904000  | -3.858415000 | 0.773153000  |
| H | 5.328655000  | -5.520415000 | -0.572608000 |
| H | 5.721602000  | -3.958718000 | -1.313181000 |
| H | 6.203220000  | -3.979530000 | 1.092922000  |
| H | 4.512165000  | -4.415839000 | 1.470494000  |
| N | 4.853931000  | -2.440288000 | 0.737337000  |
| C | 3.845984000  | -2.022720000 | 1.402305000  |
| C | 3.393804000  | -0.623008000 | 1.318500000  |
| H | 3.241919000  | -2.687253000 | 2.032887000  |
| C | 4.185979000  | 0.352593000  | 0.697189000  |
| C | 2.124607000  | -0.261058000 | 1.833846000  |
| C | 3.790684000  | 1.692354000  | 0.598546000  |
| H | 5.143424000  | 0.026838000  | 0.301132000  |
| C | 1.703249000  | 1.091649000  | 1.738885000  |
| O | 1.347111000  | -1.212581000 | 2.365303000  |
| C | 2.551519000  | 2.034177000  | 1.140864000  |
| C | 4.670567000  | 2.734147000  | -0.076242000 |
| C | 0.386756000  | 1.508165000  | 2.211260000  |
| H | 0.482600000  | -0.787621000 | 2.644607000  |
| H | 2.215902000  | 3.066704000  | 1.091230000  |
| H | 4.156213000  | 3.701547000  | 0.011498000  |
| C | 6.037115000  | 2.867289000  | 0.620133000  |
| C | 4.845824000  | 2.434529000  | -1.577042000 |
| H | 0.110910000  | 2.555065000  | 2.016408000  |
| N | -0.421834000 | 0.710147000  | 2.803297000  |

|    |              |              |              |
|----|--------------|--------------|--------------|
| H  | 6.633068000  | 3.661630000  | 0.155721000  |
| H  | 5.916717000  | 3.102601000  | 1.682986000  |
| H  | 6.608460000  | 1.934574000  | 0.546341000  |
| H  | 3.878851000  | 2.402657000  | -2.093495000 |
| H  | 5.460675000  | 3.203264000  | -2.059499000 |
| H  | 5.340158000  | 1.467378000  | -1.728200000 |
| C  | -1.736832000 | 1.202742000  | 3.181019000  |
| H  | -1.899456000 | 2.237234000  | 2.838202000  |
| H  | -1.804017000 | 1.199771000  | 4.278472000  |
| C  | -2.827637000 | 0.306398000  | 2.584454000  |
| H  | -2.783599000 | -0.698079000 | 3.034858000  |
| H  | -2.601941000 | 0.159962000  | 1.529153000  |
| Zn | -3.669687000 | -1.379934000 | -0.718607000 |
| Cl | -5.673121000 | -2.295598000 | -1.203270000 |
| Cl | -1.977057000 | -2.387319000 | 0.510183000  |
| H  | 2.185582000  | -0.694103000 | -1.094062000 |

### TS1

**Charge = 0, multiplicity = 1, Nimag = 1 (-163 cm<sup>-1</sup>), HF = -2633.6357008 a.u.**

|   |              |              |              |
|---|--------------|--------------|--------------|
| O | -2.031765000 | 0.109735000  | 2.080658000  |
| O | 0.751032000  | -0.010108000 | -2.091802000 |
| N | 1.019131000  | 4.177082000  | -0.790344000 |
| N | -2.237511000 | -2.686925000 | 0.029633000  |
| N | -0.129966000 | 2.170156000  | 1.290333000  |
| N | -0.222930000 | -2.487958000 | -2.122849000 |
| N | -3.495950000 | -2.171547000 | 2.119806000  |
| N | 3.715155000  | 2.508414000  | -1.014860000 |
| C | 2.090249000  | -1.976598000 | -1.661951000 |
| C | -2.615639000 | 0.474351000  | 0.984595000  |
| C | 3.339213000  | -2.503422000 | -1.291278000 |
| H | 3.433342000  | -3.583064000 | -1.186931000 |
| C | 0.964029000  | -2.875336000 | -1.805625000 |
| H | 1.169454000  | -3.936526000 | -1.600683000 |
| C | 1.935221000  | -0.571765000 | -1.779127000 |
| C | 4.438186000  | -1.692794000 | -1.025244000 |
| C | -3.623532000 | -0.366723000 | 0.402789000  |
| C | 4.257753000  | -0.308807000 | -1.142224000 |
| H | 5.074909000  | 0.373204000  | -0.926967000 |
| C | -2.297366000 | 1.676109000  | 0.267969000  |
| C | -1.138111000 | 2.506129000  | 0.561961000  |
| H | -1.132249000 | 3.464955000  | 0.034906000  |
| C | -4.121271000 | 1.277326000  | -1.345130000 |
| C | 3.040194000  | 0.265241000  | -1.519580000 |
| C | 1.031935000  | 4.365076000  | 0.669206000  |
| H | 0.171170000  | 4.978613000  | 0.975737000  |
| H | 1.921821000  | 4.928905000  | 0.971475000  |

|   |              |              |              |
|---|--------------|--------------|--------------|
| C | -4.345977000 | 0.045503000  | -0.723020000 |
| H | -5.101727000 | -0.626958000 | -1.126637000 |
| C | -3.732277000 | -1.754428000 | 0.840142000  |
| H | -4.483476000 | -2.346463000 | 0.312383000  |
| C | -3.079692000 | 2.054753000  | -0.835183000 |
| H | -2.834317000 | 2.990723000  | -1.335777000 |
| C | 2.223719000  | 4.572833000  | -1.521343000 |
| H | 2.328296000  | 5.664066000  | -1.454288000 |
| H | 2.044652000  | 4.351014000  | -2.580714000 |
| C | 2.887022000  | 1.728023000  | -1.593379000 |
| H | 2.021307000  | 2.071928000  | -2.170369000 |
| C | -4.925702000 | 1.717108000  | -2.558487000 |
| H | -4.551772000 | 2.706189000  | -2.856241000 |
| C | -2.503646000 | -2.982273000 | -1.382686000 |
| H | -2.868476000 | -2.050144000 | -1.829720000 |
| H | -3.309146000 | -3.724023000 | -1.432729000 |
| C | 3.566198000  | 3.954458000  | -1.067886000 |
| H | 4.365164000  | 4.345633000  | -1.716008000 |
| H | 3.814637000  | 4.319795000  | -0.062220000 |
| C | -1.283202000 | -3.474625000 | -2.169684000 |
| H | -0.954955000 | -4.455399000 | -1.786305000 |
| H | -1.602902000 | -3.618989000 | -3.211679000 |
| C | -2.054272000 | -3.784485000 | 0.991294000  |
| H | -1.045310000 | -3.719513000 | 1.401502000  |
| H | -2.188688000 | -4.752279000 | 0.500294000  |
| C | 5.771185000  | -2.280497000 | -0.589125000 |
| H | 5.663732000  | -3.374344000 | -0.592894000 |
| C | 1.033824000  | 3.054862000  | 1.462079000  |
| H | 1.912259000  | 2.457347000  | 1.186305000  |
| H | 1.115740000  | 3.245373000  | 2.539042000  |
| C | -3.123473000 | -3.573803000 | 2.130520000  |
| H | -4.010311000 | -4.184415000 | 1.924059000  |
| H | -2.733023000 | -3.856974000 | 3.109313000  |
| C | 6.123697000  | -1.850429000 | 0.847317000  |
| H | 6.256713000  | -0.763799000 | 0.908699000  |
| H | 7.057893000  | -2.322022000 | 1.175426000  |
| H | 5.329045000  | -2.127463000 | 1.547944000  |
| C | 6.902970000  | -1.919785000 | -1.568402000 |
| H | 7.065838000  | -0.835785000 | -1.598468000 |
| H | 6.668264000  | -2.251346000 | -2.586174000 |
| H | 7.845153000  | -2.389353000 | -1.261550000 |
| C | -4.714354000 | 0.764464000  | -3.750692000 |
| H | -5.087246000 | -0.241905000 | -3.520715000 |
| H | -3.651715000 | 0.679410000  | -4.003870000 |
| H | -5.252539000 | 1.121276000  | -4.636726000 |

|    |              |              |              |
|----|--------------|--------------|--------------|
| C  | -6.422353000 | 1.864492000  | -2.229270000 |
| H  | -6.978868000 | 2.230169000  | -3.100353000 |
| H  | -6.577433000 | 2.564927000  | -1.401696000 |
| H  | -6.857784000 | 0.900872000  | -1.936945000 |
| H  | 0.088036000  | -0.747432000 | -2.184629000 |
| H  | 0.806027000  | 3.209178000  | -1.004398000 |
| H  | -1.451049000 | -2.029337000 | 0.128069000  |
| H  | -2.846488000 | -1.530737000 | 2.586198000  |
| Zn | -0.056400000 | 0.372483000  | 2.434097000  |
| Cl | 0.714101000  | 0.970311000  | 4.471664000  |
| Cl | 0.640087000  | -1.564493000 | 1.334053000  |

## Int2

**Charge = 0, multiplicity = 1, Nimag = 0, HF = -2633.6381266 a.u.**

|   |              |              |              |
|---|--------------|--------------|--------------|
| O | -1.712477000 | -0.976235000 | 1.208123000  |
| O | 0.931130000  | 0.998190000  | -2.202789000 |
| N | 1.181976000  | 3.881597000  | 0.427482000  |
| N | -2.562939000 | -2.403595000 | -0.921302000 |
| N | 0.219749000  | 1.154873000  | 1.474083000  |
| N | -0.178555000 | -1.389188000 | -2.626530000 |
| N | -3.987879000 | -2.707096000 | 0.964161000  |
| N | 3.827798000  | 3.154421000  | -0.530102000 |
| C | 2.106327000  | -1.095118000 | -1.902040000 |
| C | -2.466323000 | -0.008205000 | 0.760125000  |
| C | 3.280478000  | -1.747224000 | -1.487044000 |
| H | 3.283289000  | -2.834226000 | -1.468658000 |
| C | 0.960103000  | -1.894604000 | -2.293369000 |
| H | 1.117646000  | -2.979547000 | -2.302148000 |
| C | 2.056152000  | 0.318851000  | -1.886203000 |
| C | 4.403141000  | -1.050145000 | -1.050722000 |
| C | -3.671332000 | -0.376902000 | 0.094464000  |
| C | 4.332254000  | 0.349060000  | -1.052313000 |
| H | 5.169320000  | 0.944195000  | -0.699850000 |
| C | -2.134769000 | 1.373230000  | 0.816247000  |
| C | -0.826697000 | 1.867174000  | 1.221728000  |
| H | -0.741704000 | 2.956637000  | 1.218784000  |
| C | -4.284520000 | 1.959312000  | -0.240935000 |
| C | 3.194956000  | 1.043645000  | -1.474882000 |
| C | 1.609191000  | 3.322353000  | 1.720027000  |
| H | 1.016879000  | 3.775720000  | 2.528375000  |
| H | 2.662217000  | 3.552094000  | 1.933558000  |
| C | -4.548597000 | 0.586238000  | -0.389321000 |
| H | -5.458355000 | 0.265176000  | -0.893970000 |
| C | -3.866564000 | -1.839257000 | -0.158024000 |
| H | -4.674715000 | -2.028974000 | -0.874714000 |
| C | -3.070740000 | 2.314629000  | 0.344061000  |

|   |              |              |              |
|---|--------------|--------------|--------------|
| H | -2.812011000 | 3.370212000  | 0.414495000  |
| C | 2.026688000  | 4.915378000  | -0.153404000 |
| H | 1.965421000  | 5.818519000  | 0.466646000  |
| H | 1.581107000  | 5.173050000  | -1.120665000 |
| C | 3.116015000  | 2.509240000  | -1.372785000 |
| H | 2.367592000  | 2.986824000  | -2.019495000 |
| C | -5.263659000 | 3.011285000  | -0.739362000 |
| H | -4.819899000 | 3.993722000  | -0.528095000 |
| C | -2.547619000 | -2.031187000 | -2.361529000 |
| H | -2.782562000 | -0.963687000 | -2.406898000 |
| H | -3.355390000 | -2.590284000 | -2.845638000 |
| C | 3.552326000  | 4.574090000  | -0.348052000 |
| H | 3.929625000  | 5.162718000  | -1.197283000 |
| H | 4.122645000  | 4.899469000  | 0.528452000  |
| C | -1.219101000 | -2.297661000 | -3.067320000 |
| H | -0.930318000 | -3.354958000 | -2.948974000 |
| H | -1.401507000 | -2.131524000 | -4.138639000 |
| C | -2.518965000 | -3.867262000 | -0.580186000 |
| H | -1.527766000 | -4.077809000 | -0.174900000 |
| H | -2.685731000 | -4.454378000 | -1.486161000 |
| C | 5.638497000  | -1.777603000 | -0.543663000 |
| H | 5.467108000  | -2.852806000 | -0.689670000 |
| C | 1.508446000  | 1.793822000  | 1.783825000  |
| H | 2.236294000  | 1.358648000  | 1.088925000  |
| H | 1.788215000  | 1.446453000  | 2.785618000  |
| C | -3.653925000 | -4.044333000 | 0.474934000  |
| H | -4.538653000 | -4.488673000 | 0.004127000  |
| H | -3.345607000 | -4.689015000 | 1.299791000  |
| C | 5.835191000  | -1.537469000 | 0.965297000  |
| H | 6.013468000  | -0.475073000 | 1.171596000  |
| H | 6.698561000  | -2.101287000 | 1.338271000  |
| H | 4.949992000  | -1.845715000 | 1.531587000  |
| C | 6.899964000  | -1.391923000 | -1.336860000 |
| H | 7.132608000  | -0.327176000 | -1.215813000 |
| H | 6.771839000  | -1.587073000 | -2.407604000 |
| H | 7.767005000  | -1.962735000 | -0.984168000 |
| C | -5.476835000 | 2.918203000  | -2.261767000 |
| H | -5.936652000 | 1.961190000  | -2.538785000 |
| H | -4.525641000 | 3.001594000  | -2.799070000 |
| H | -6.141453000 | 3.716914000  | -2.611566000 |
| C | -6.606363000 | 2.936488000  | 0.010700000  |
| H | -7.283548000 | 3.732288000  | -0.321824000 |
| H | -6.460554000 | 3.036935000  | 1.091529000  |
| H | -7.105919000 | 1.976587000  | -0.170550000 |
| H | 0.232687000  | 0.324654000  | -2.430857000 |



|    |              |              |              |
|----|--------------|--------------|--------------|
| H  | 1.061497000  | 3.129540000  | -0.244451000 |
| H  | -1.778572000 | -1.957364000 | -0.402158000 |
| H  | -3.320816000 | -2.405456000 | 1.674122000  |
| Zn | 0.167297000  | -0.962159000 | 1.911790000  |
| Cl | 0.799342000  | -0.923687000 | 4.093313000  |
| Cl | 0.720709000  | -2.877958000 | 0.670573000  |

### Int3

**Charge = 0, multiplicity = 1, Nimag = 0, HF = -3619.8114136 a.u.**

|   |              |              |              |
|---|--------------|--------------|--------------|
| O | -1.346885000 | 2.126624000  | -1.101379000 |
| O | 1.298732000  | -2.151548000 | 1.993844000  |
| N | 1.853287000  | -2.631156000 | -1.675077000 |
| N | -2.612925000 | 2.155247000  | 1.317552000  |
| N | 0.723269000  | 0.293727000  | -1.914554000 |
| N | -0.398230000 | 0.145445000  | 2.482371000  |
| N | -3.739173000 | 3.513822000  | -0.269846000 |
| N | 4.136503000  | -3.432741000 | -0.547857000 |
| C | 1.990252000  | 0.149798000  | 1.957163000  |
| C | -2.112744000 | 1.097865000  | -1.374307000 |
| C | 3.031932000  | 1.038198000  | 1.680224000  |
| H | 2.881717000  | 2.087713000  | 1.918511000  |
| C | 0.766904000  | 0.700580000  | 2.521545000  |
| H | 0.868564000  | 1.684873000  | 2.983562000  |
| C | 2.149455000  | -1.253100000 | 1.667385000  |
| C | 4.230010000  | 0.663181000  | 1.040227000  |
| C | -3.423969000 | 1.088954000  | -0.820085000 |
| C | 4.349486000  | -0.664135000 | 0.656251000  |
| H | 5.234921000  | -0.967723000 | 0.099780000  |
| C | -1.696640000 | -0.049961000 | -2.101181000 |
| C | -0.302120000 | -0.359903000 | -2.350017000 |
| H | -0.151638000 | -1.296585000 | -2.894115000 |
| C | -3.947314000 | -1.030691000 | -1.911431000 |
| C | 3.343745000  | -1.616927000 | 0.928266000  |
| C | 2.309645000  | -1.623999000 | -2.621092000 |
| H | 1.877533000  | -1.775914000 | -3.626272000 |
| H | 3.397039000  | -1.741689000 | -2.746202000 |
| C | -4.304353000 | 0.045588000  | -1.081943000 |
| H | -5.286407000 | 0.057141000  | -0.613306000 |
| C | -3.743670000 | 2.159717000  | 0.174606000  |
| H | -4.663315000 | 1.940632000  | 0.730091000  |
| C | -2.642354000 | -1.054315000 | -2.389186000 |
| H | -2.306302000 | -1.930144000 | -2.939636000 |
| C | 2.159035000  | -4.006614000 | -1.983636000 |
| H | 2.072662000  | -4.239449000 | -3.056061000 |
| H | 1.431769000  | -4.626858000 | -1.452942000 |
| C | 3.259713000  | -2.878809000 | 0.291565000  |

|    |              |              |              |
|----|--------------|--------------|--------------|
| H  | 2.425721000  | -3.502228000 | 0.592820000  |
| C  | -4.887128000 | -2.204766000 | -2.134023000 |
| H  | -4.421074000 | -2.853758000 | -2.888056000 |
| C  | -2.718107000 | 1.002603000  | 2.258522000  |
| H  | -2.871518000 | 0.101172000  | 1.658309000  |
| H  | -3.616516000 | 1.163485000  | 2.861391000  |
| C  | 3.618681000  | -4.402369000 | -1.517589000 |
| H  | 3.600150000  | -5.402125000 | -1.072896000 |
| H  | 4.320389000  | -4.430237000 | -2.354700000 |
| C  | -1.500540000 | 0.824341000  | 3.165916000  |
| H  | -1.179370000 | 1.787443000  | 3.585959000  |
| H  | -1.817200000 | 0.171433000  | 3.985133000  |
| C  | -2.680919000 | 3.529580000  | 1.919881000  |
| H  | -1.664352000 | 3.918427000  | 1.980593000  |
| H  | -3.115062000 | 3.456080000  | 2.919572000  |
| C  | 5.281964000  | 1.704778000  | 0.687748000  |
| H  | 5.000179000  | 2.635231000  | 1.197250000  |
| C  | 2.091773000  | -0.188005000 | -2.136695000 |
| H  | 2.614847000  | -0.054744000 | -1.186445000 |
| H  | 2.559781000  | 0.508859000  | -2.841650000 |
| C  | -3.580999000 | 4.335715000  | 0.930953000  |
| H  | -4.563353000 | 4.514867000  | 1.382228000  |
| H  | -3.141133000 | 5.301401000  | 0.675727000  |
| C  | 5.282991000  | 1.988384000  | -0.827694000 |
| H  | 5.544013000  | 1.081705000  | -1.390425000 |
| H  | 6.024004000  | 2.757155000  | -1.075225000 |
| H  | 4.306349000  | 2.337298000  | -1.180071000 |
| C  | 6.683540000  | 1.306549000  | 1.182328000  |
| H  | 7.043184000  | 0.400283000  | 0.678587000  |
| H  | 6.688609000  | 1.115061000  | 2.261099000  |
| H  | 7.403862000  | 2.104622000  | 0.970541000  |
| C  | -5.028631000 | -3.025729000 | -0.836568000 |
| H  | -5.509719000 | -2.429280000 | -0.050841000 |
| H  | -4.048062000 | -3.338709000 | -0.463408000 |
| H  | -5.646178000 | -3.916464000 | -1.004429000 |
| C  | -6.259300000 | -1.771342000 | -2.677376000 |
| H  | -6.887836000 | -2.647362000 | -2.875380000 |
| H  | -6.158777000 | -1.201184000 | -3.607730000 |
| H  | -6.794153000 | -1.142490000 | -1.954840000 |
| H  | 0.902662000  | -2.512535000 | -1.324876000 |
| H  | -1.733938000 | 2.113609000  | 0.762704000  |
| H  | -2.946105000 | 3.637242000  | -0.898447000 |
| Zn | 0.632954000  | 2.343762000  | -1.241413000 |
| Cl | 2.030302000  | 3.261679000  | -2.790618000 |
| Cl | 0.709292000  | 3.426371000  | 0.854889000  |

|    |              |              |              |
|----|--------------|--------------|--------------|
| Zn | -0.707463000 | -1.945889000 | 1.933450000  |
| Cl | -1.052497000 | -2.874238000 | -0.171233000 |
| Cl | -2.275454000 | -2.467206000 | 3.500372000  |
| H  | 4.885461000  | -2.836745000 | -0.881384000 |

## TS2

**Charge = 0, multiplicity = 1, Nimag = 1 (-211 cm<sup>-1</sup>), HF = -3619.8019754 a.u.**

|   |              |              |              |
|---|--------------|--------------|--------------|
| O | -1.289375000 | 1.950919000  | -0.782785000 |
| O | 1.086312000  | -2.022233000 | 0.977399000  |
| N | 1.931652000  | -2.687987000 | -1.694737000 |
| N | -2.540613000 | 1.996545000  | 1.544699000  |
| N | 0.666576000  | 0.218017000  | -1.896494000 |
| N | -0.317711000 | 0.030967000  | 2.483315000  |
| N | -3.710622000 | 3.426716000  | 0.050404000  |
| N | 4.240611000  | -3.354700000 | -1.031007000 |
| C | 1.999929000  | 0.108057000  | 1.686838000  |
| C | -2.116105000 | 1.002466000  | -1.153429000 |
| C | 3.104481000  | 0.967159000  | 1.591888000  |
| H | 3.014667000  | 1.954618000  | 2.035569000  |
| C | 0.831985000  | 0.609986000  | 2.396330000  |
| H | 0.976747000  | 1.575862000  | 2.887125000  |
| C | 2.065439000  | -1.177852000 | 1.054795000  |
| C | 4.287356000  | 0.654721000  | 0.906936000  |
| C | -3.432383000 | 1.034925000  | -0.617736000 |
| C | 4.369448000  | -0.611896000 | 0.327862000  |
| H | 5.277705000  | -0.905325000 | -0.192735000 |
| C | -1.762096000 | -0.094883000 | -1.983075000 |
| C | -0.388745000 | -0.415539000 | -2.294543000 |
| H | -0.277118000 | -1.325546000 | -2.896874000 |
| C | -4.086794000 | -0.898305000 | -1.957021000 |
| C | 3.300650000  | -1.513958000 | 0.402847000  |
| C | 2.223428000  | -1.665533000 | -2.722253000 |
| H | 1.657370000  | -1.907105000 | -3.631323000 |
| H | 3.283389000  | -1.770339000 | -2.988037000 |
| C | -4.383465000 | 0.108567000  | -1.020155000 |
| H | -5.380845000 | 0.156998000  | -0.588381000 |
| C | -3.705210000 | 2.054698000  | 0.448025000  |
| H | -4.611382000 | 1.818664000  | 1.017733000  |
| C | -2.772084000 | -0.991331000 | -2.392217000 |
| H | -2.492179000 | -1.821583000 | -3.038645000 |
| C | 2.157068000  | -4.062122000 | -2.154981000 |
| H | 1.903001000  | -4.175844000 | -3.213187000 |
| H | 1.514193000  | -4.728034000 | -1.575724000 |
| C | 3.246940000  | -2.792270000 | -0.274780000 |
| H | 2.633921000  | -3.523733000 | 0.246903000  |
| C | -5.142454000 | -1.901815000 | -2.392529000 |

|    |              |              |              |
|----|--------------|--------------|--------------|
| H  | -4.660216000 | -2.592446000 | -3.098185000 |
| C  | -2.641711000 | 0.848723000  | 2.491026000  |
| H  | -2.854462000 | -0.045218000 | 1.893655000  |
| H  | -3.490640000 | 1.044320000  | 3.153321000  |
| C  | 3.680894000  | -4.401257000 | -1.895194000 |
| H  | 3.756404000  | -5.375590000 | -1.404333000 |
| H  | 4.257451000  | -4.448524000 | -2.821681000 |
| C  | -1.361094000 | 0.636687000  | 3.304031000  |
| H  | -1.027009000 | 1.575185000  | 3.769820000  |
| H  | -1.589527000 | -0.080079000 | 4.102631000  |
| C  | -2.494964000 | 3.375716000  | 2.144203000  |
| H  | -1.468668000 | 3.738037000  | 2.064592000  |
| H  | -2.792071000 | 3.321426000  | 3.193819000  |
| C  | 5.355419000  | 1.729824000  | 0.754758000  |
| H  | 5.468522000  | 2.215292000  | 1.734880000  |
| C  | 2.005586000  | -0.211645000 | -2.299226000 |
| H  | 2.673946000  | 0.033948000  | -1.474902000 |
| H  | 2.313056000  | 0.432271000  | -3.132440000 |
| C  | -3.487909000 | 4.199528000  | 1.272612000  |
| H  | -4.440880000 | 4.321829000  | 1.800044000  |
| H  | -3.098326000 | 5.191070000  | 1.035497000  |
| C  | 4.868215000  | 2.802619000  | -0.244343000 |
| H  | 4.725153000  | 2.368002000  | -1.241309000 |
| H  | 5.600513000  | 3.614201000  | -0.329330000 |
| H  | 3.910085000  | 3.236571000  | 0.060453000  |
| C  | 6.730650000  | 1.186905000  | 0.346373000  |
| H  | 6.711745000  | 0.776596000  | -0.671680000 |
| H  | 7.078375000  | 0.400536000  | 1.026732000  |
| H  | 7.470383000  | 1.994161000  | 0.352443000  |
| C  | -5.653170000 | -2.735628000 | -1.202447000 |
| H  | -6.187988000 | -2.104514000 | -0.481737000 |
| H  | -4.824104000 | -3.212961000 | -0.672037000 |
| H  | -6.351885000 | -3.507851000 | -1.546528000 |
| C  | -6.305654000 | -1.216046000 | -3.132850000 |
| H  | -7.036212000 | -1.957331000 | -3.477735000 |
| H  | -5.948500000 | -0.652639000 | -4.002214000 |
| H  | -6.831779000 | -0.514565000 | -2.473313000 |
| H  | 1.058726000  | -2.535695000 | -1.183317000 |
| H  | -1.695272000 | 1.907363000  | 0.938452000  |
| H  | -2.948605000 | 3.573902000  | -0.610372000 |
| Zn | 0.639877000  | 2.281018000  | -1.167668000 |
| Cl | 1.729448000  | 3.157823000  | -2.972914000 |
| Cl | 0.940121000  | 3.464118000  | 0.830247000  |
| Zn | -0.615956000 | -2.049239000 | 2.045866000  |
| H  | 4.832604000  | -2.685953000 | -1.513195000 |

|    |              |              |             |
|----|--------------|--------------|-------------|
| Cl | -2.298200000 | -2.527182000 | 0.581404000 |
| Cl | -0.609871000 | -2.856686000 | 4.178849000 |

#### Int4

**Charge = 0, multiplicity = 1, Nimag = 0, HF = -3619.8041292 a.u.**

|   |              |              |              |
|---|--------------|--------------|--------------|
| O | -1.246754000 | 1.842595000  | -0.845626000 |
| O | 1.007913000  | -1.882494000 | 0.903702000  |
| N | 2.031859000  | -2.852800000 | -1.381803000 |
| N | -2.551542000 | 2.100566000  | 1.445848000  |
| N | 0.655361000  | 0.015853000  | -1.899187000 |
| N | -0.366561000 | 0.175081000  | 2.438366000  |
| N | -3.619318000 | 3.466682000  | -0.169221000 |
| N | 4.310229000  | -3.326084000 | -0.889995000 |
| C | 1.933005000  | 0.260389000  | 1.594489000  |
| C | -2.105274000 | 0.907800000  | -1.171349000 |
| C | 3.051796000  | 1.110977000  | 1.507214000  |
| H | 2.965562000  | 2.103302000  | 1.940206000  |
| C | 0.773121000  | 0.767345000  | 2.310379000  |
| H | 0.915568000  | 1.747167000  | 2.773445000  |
| C | 1.995085000  | -1.024148000 | 0.973508000  |
| C | 4.236410000  | 0.772854000  | 0.851473000  |
| C | -3.428472000 | 1.025207000  | -0.664291000 |
| C | 4.312797000  | -0.511951000 | 0.294731000  |
| H | 5.230172000  | -0.837526000 | -0.187898000 |
| C | -1.783811000 | -0.244294000 | -1.936491000 |
| C | -0.424196000 | -0.605236000 | -2.253275000 |
| H | -0.347056000 | -1.532295000 | -2.835851000 |
| C | -4.133751000 | -0.968112000 | -1.885970000 |
| C | 3.227705000  | -1.381228000 | 0.350166000  |
| C | 2.173979000  | -1.954530000 | -2.580443000 |
| H | 1.493986000  | -2.353471000 | -3.337646000 |
| H | 3.188481000  | -2.099072000 | -2.964814000 |
| C | -4.406152000 | 0.108600000  | -1.021340000 |
| H | -5.407289000 | 0.221530000  | -0.610731000 |
| C | -3.683690000 | 2.126341000  | 0.322310000  |
| H | -4.613434000 | 1.967684000  | 0.880971000  |
| C | -2.820356000 | -1.130052000 | -2.302099000 |
| H | -2.564230000 | -2.004383000 | -2.898268000 |
| C | 2.232058000  | -4.283591000 | -1.760683000 |
| H | 1.861582000  | -4.468350000 | -2.769988000 |
| H | 1.666365000  | -4.899633000 | -1.059255000 |
| C | 3.194543000  | -2.736927000 | -0.249073000 |
| H | 2.780668000  | -3.437607000 | 0.484191000  |
| C | -5.218139000 | -1.963592000 | -2.265265000 |
| H | -4.754334000 | -2.712401000 | -2.922272000 |
| C | -2.682452000 | 0.995519000  | 2.438673000  |

|    |              |              |              |
|----|--------------|--------------|--------------|
| H  | -2.910387000 | 0.080860000  | 1.879594000  |
| H  | -3.528046000 | 1.236005000  | 3.090186000  |
| C  | 3.782498000  | -4.501916000 | -1.607101000 |
| H  | 3.966081000  | -5.410878000 | -1.027421000 |
| H  | 4.280325000  | -4.612630000 | -2.573278000 |
| C  | -1.403502000 | 0.794084000  | 3.256343000  |
| H  | -1.066203000 | 1.740165000  | 3.704396000  |
| H  | -1.630847000 | 0.093256000  | 4.069248000  |
| C  | -2.504707000 | 3.502766000  | 1.986071000  |
| H  | -1.464763000 | 3.831422000  | 1.973534000  |
| H  | -2.888813000 | 3.503194000  | 3.008596000  |
| C  | 5.329965000  | 1.823252000  | 0.706398000  |
| H  | 5.430803000  | 2.321816000  | 1.681282000  |
| C  | 1.959042000  | -0.453160000 | -2.376711000 |
| H  | 2.711568000  | -0.054709000 | -1.700824000 |
| H  | 2.154389000  | 0.027141000  | -3.343617000 |
| C  | -3.399006000 | 4.316587000  | 1.002804000  |
| H  | -4.363160000 | 4.543734000  | 1.471478000  |
| H  | -2.929830000 | 5.257114000  | 0.709192000  |
| C  | 4.889061000  | 2.889374000  | -0.320377000 |
| H  | 4.753639000  | 2.442785000  | -1.312697000 |
| H  | 5.641380000  | 3.683138000  | -0.401768000 |
| H  | 3.933958000  | 3.347249000  | -0.042668000 |
| C  | 6.702807000  | 1.245533000  | 0.339191000  |
| H  | 6.698901000  | 0.819572000  | -0.672467000 |
| H  | 7.018329000  | 0.463064000  | 1.039464000  |
| H  | 7.458960000  | 2.037531000  | 0.350507000  |
| C  | -5.759778000 | -2.703869000 | -1.027879000 |
| H  | -6.275805000 | -2.011201000 | -0.351109000 |
| H  | -4.948504000 | -3.173861000 | -0.464427000 |
| H  | -6.482344000 | -3.472973000 | -1.326555000 |
| C  | -6.356075000 | -1.291614000 | -3.055572000 |
| H  | -7.105604000 | -2.031710000 | -3.359899000 |
| H  | -5.977206000 | -0.793605000 | -3.955130000 |
| H  | -6.866197000 | -0.535920000 | -2.445247000 |
| H  | 1.169554000  | -2.653132000 | -0.836977000 |
| H  | -1.693699000 | 1.971811000  | 0.863165000  |
| H  | -2.830842000 | 3.535121000  | -0.811524000 |
| Zn | 0.693379000  | 2.124485000  | -1.216320000 |
| Cl | 1.917612000  | 2.833496000  | -3.011292000 |
| Cl | 0.870130000  | 3.553100000  | 0.642619000  |
| Zn | -0.628401000 | -1.920824000 | 2.074042000  |
| H  | 4.787591000  | -2.676173000 | -1.508619000 |
| Cl | -2.397391000 | -2.486066000 | 0.747770000  |
| Cl | -0.438890000 | -2.688958000 | 4.212795000  |

1'

Charge = 0, multiplicity = 1, Nimag = 0, HF = -2698.1689281 a.u.

|    |              |              |              |
|----|--------------|--------------|--------------|
| Zn | 0.513765000  | -1.488377000 | -1.032297000 |
| Zn | -0.513607000 | 1.491234000  | -1.030607000 |
| Cl | 0.047803000  | 2.485512000  | -3.007445000 |
| Cl | -0.050238000 | -2.478530000 | -3.010504000 |
| O  | 1.247422000  | 0.383084000  | -0.511791000 |
| O  | -1.245479000 | -0.380421000 | -0.508544000 |
| N  | -2.537089000 | 2.389938000  | -0.487811000 |
| N  | 2.537172000  | -2.388622000 | -0.493299000 |
| N  | 0.012335000  | 2.705390000  | 0.643161000  |
| N  | -0.011345000 | -2.705798000 | 0.639328000  |
| N  | 3.522521000  | -1.096996000 | -2.035773000 |
| N  | -3.521877000 | 1.100533000  | -2.032243000 |
| H  | -4.271344000 | 0.506146000  | -2.369008000 |
| C  | -2.256704000 | -1.827421000 | 1.115074000  |
| C  | 2.270219000  | 0.684838000  | 0.241899000  |
| C  | -3.380986000 | -2.111694000 | 1.922306000  |
| H  | -3.337447000 | -2.987337000 | 2.569146000  |
| C  | -1.128176000 | -2.720011000 | 1.281244000  |
| H  | -1.268942000 | -3.483777000 | 2.059751000  |
| C  | -2.269162000 | -0.684738000 | 0.242854000  |
| C  | -4.522989000 | -1.329623000 | 1.930256000  |
| C  | 3.444982000  | -0.133146000 | 0.264601000  |
| C  | -4.513462000 | -0.203136000 | 1.088930000  |
| H  | -5.388987000 | 0.444186000  | 1.070513000  |
| C  | 2.257437000  | 1.825190000  | 1.117178000  |
| C  | 1.128964000  | 2.717491000  | 1.285439000  |
| H  | 1.269587000  | 3.478924000  | 2.066253000  |
| C  | 4.523046000  | 1.324677000  | 1.932707000  |
| C  | -3.444283000 | 0.132631000  | 0.266395000  |
| C  | -2.392992000 | 2.995677000  | 0.839649000  |
| H  | -2.453001000 | 2.189643000  | 1.578373000  |
| H  | -3.201011000 | 3.715286000  | 1.049386000  |
| C  | 4.513661000  | 0.200159000  | 1.088778000  |
| H  | 5.388857000  | -0.447576000 | 1.069573000  |
| C  | 3.600963000  | -1.354910000 | -0.609923000 |
| H  | 4.558743000  | -1.841378000 | -0.315064000 |
| C  | 3.381264000  | 2.107092000  | 1.925882000  |
| H  | 3.337516000  | 2.981069000  | 2.574957000  |
| C  | -2.899090000 | 3.339254000  | -1.573365000 |
| H  | -2.022345000 | 3.900165000  | -1.898700000 |
| H  | -3.670076000 | 4.037452000  | -1.211401000 |
| C  | -3.600427000 | 1.355922000  | -0.605893000 |
| H  | -4.558424000 | 1.841532000  | -0.310332000 |

|   |              |              |              |
|---|--------------|--------------|--------------|
| C | 5.719950000  | 1.652424000  | 2.810666000  |
| H | 5.474062000  | 2.567331000  | 3.367712000  |
| C | 2.393991000  | -2.996978000 | 0.833116000  |
| H | 2.454712000  | -2.192412000 | 1.573375000  |
| H | 3.202109000  | -3.717079000 | 1.040752000  |
| C | -3.451001000 | 2.418497000  | -2.689778000 |
| H | -4.429977000 | 2.787631000  | -3.031258000 |
| H | -2.766733000 | 2.372746000  | -3.539504000 |
| C | 1.025263000  | -3.682396000 | 0.950986000  |
| H | 0.960885000  | -4.501448000 | 0.222195000  |
| H | 0.904978000  | -4.115292000 | 1.954537000  |
| C | 2.898051000  | -3.336062000 | -1.580867000 |
| H | 2.020895000  | -3.896116000 | -1.906578000 |
| H | 3.669093000  | -4.035124000 | -1.220684000 |
| C | -5.720438000 | -1.659746000 | 2.806619000  |
| H | -5.474745000 | -2.576003000 | 3.361526000  |
| C | -1.024241000 | 3.681086000  | 0.957696000  |
| H | -0.960672000 | 4.501586000  | 0.230469000  |
| H | -0.903142000 | 4.112014000  | 1.961997000  |
| C | 3.449452000  | -2.413503000 | -2.695964000 |
| H | 4.427529000  | -2.782948000 | -3.039623000 |
| H | 2.764057000  | -2.365250000 | -3.544655000 |
| C | -6.978080000 | -1.948821000 | 1.966153000  |
| H | -7.280979000 | -1.063220000 | 1.394065000  |
| H | -7.819877000 | -2.233033000 | 2.608891000  |
| H | -6.797974000 | -2.760782000 | 1.253432000  |
| C | -5.992519000 | -0.550365000 | 3.839608000  |
| H | -6.256059000 | 0.392641000  | 3.344916000  |
| H | -5.109944000 | -0.365797000 | 4.462024000  |
| H | -6.826735000 | -0.824806000 | 4.496320000  |
| C | 5.991398000  | 0.540570000  | 3.841122000  |
| H | 6.255529000  | -0.401198000 | 3.344391000  |
| H | 5.108397000  | 0.354328000  | 4.462442000  |
| H | 6.825079000  | 0.813605000  | 4.499098000  |
| C | 6.978151000  | 1.943414000  | 1.971604000  |
| H | 7.819442000  | 2.226604000  | 2.615456000  |
| H | 6.798314000  | 2.756643000  | 1.260275000  |
| H | 7.281608000  | 1.058905000  | 1.398105000  |
| H | 4.272652000  | -0.502946000 | -2.371578000 |

1

**Charge = 0, multiplicity = 1, Nimag = 0, HF = -4145.1346996 a.u.**

|    |              |              |              |
|----|--------------|--------------|--------------|
| Zn | -0.324385000 | -0.821589000 | 1.619427000  |
| Zn | -1.210995000 | -1.055774000 | -1.333999000 |
| Zn | 4.916497000  | -0.801510000 | -0.278557000 |
| Cl | -0.892076000 | -3.287129000 | -1.519393000 |



|    |              |              |              |
|----|--------------|--------------|--------------|
| Cl | -0.646664000 | -2.898852000 | 2.474985000  |
| Cl | 3.818496000  | -0.331992000 | -2.283835000 |
| Cl | 5.872162000  | 1.041986000  | 0.816178000  |
| Cl | 5.769574000  | -2.864795000 | 0.218241000  |
| O  | 0.275491000  | -0.215537000 | -0.280228000 |
| O  | -2.265876000 | -0.738552000 | 0.526761000  |
| N  | -3.570101000 | -1.100830000 | -2.202172000 |
| N  | 1.552831000  | 0.032999000  | 2.425564000  |
| N  | -1.238990000 | 0.467171000  | -2.683965000 |
| N  | -1.152940000 | 0.712798000  | 2.822943000  |
| N  | 2.979462000  | -0.966949000 | 0.872848000  |
| H  | 2.343280000  | -1.294015000 | 0.145999000  |
| N  | -4.142693000 | -2.551679000 | -0.573665000 |
| H  | -3.206621000 | -2.466791000 | -0.124799000 |
| H  | -4.797083000 | -2.898144000 | 0.132171000  |
| C  | -3.328527000 | 1.072772000  | 1.755880000  |
| C  | 0.972274000  | 0.879315000  | -0.586070000 |
| C  | -4.477232000 | 1.879511000  | 1.877766000  |
| H  | -4.477213000 | 2.646466000  | 2.650581000  |
| C  | -2.271876000 | 1.329486000  | 2.727636000  |
| H  | -2.498627000 | 2.128497000  | 3.446869000  |
| C  | -3.286324000 | 0.061752000  | 0.741267000  |
| C  | -5.608536000 | 1.746799000  | 1.078178000  |
| C  | 2.063754000  | 1.249533000  | 0.230909000  |
| C  | -5.576338000 | 0.727495000  | 0.119792000  |
| H  | -6.446511000 | 0.566509000  | -0.514357000 |
| C  | 0.672634000  | 1.690600000  | -1.725500000 |
| C  | -0.387541000 | 1.452110000  | -2.663323000 |
| H  | -0.472117000 | 2.205093000  | -3.456469000 |
| C  | 2.585828000  | 3.153849000  | -1.226662000 |
| C  | -4.460613000 | -0.091627000 | -0.051636000 |
| C  | -3.629579000 | 0.125427000  | -3.016940000 |
| H  | -3.848912000 | 0.955010000  | -2.339085000 |
| H  | -4.435396000 | 0.066602000  | -3.765345000 |
| C  | 2.833249000  | 2.359950000  | -0.091857000 |
| H  | 3.712730000  | 2.557330000  | 0.512003000  |
| C  | 2.546348000  | 0.351311000  | 1.340953000  |
| H  | 3.417169000  | 0.823158000  | 1.813076000  |
| C  | 1.502019000  | 2.809073000  | -2.008081000 |
| H  | 1.288488000  | 3.391121000  | -2.903253000 |
| C  | -3.756278000 | -2.374569000 | -2.932990000 |
| H  | -2.838352000 | -2.648756000 | -3.453773000 |
| H  | -4.585637000 | -2.298433000 | -3.651702000 |
| C  | -4.520291000 | -1.165485000 | -1.088026000 |
| H  | -5.557540000 | -1.269424000 | -1.448884000 |

|   |              |              |              |
|---|--------------|--------------|--------------|
| C | 3.553607000  | 4.254214000  | -1.623761000 |
| H | 3.115302000  | 4.783160000  | -2.482549000 |
| C | 1.190975000  | 1.221647000  | 3.221032000  |
| H | 1.152269000  | 2.074994000  | 2.535731000  |
| H | 1.948478000  | 1.435335000  | 3.987763000  |
| C | -4.087811000 | -3.402708000 | -1.822475000 |
| H | -5.070803000 | -3.857659000 | -1.954680000 |
| H | -3.314777000 | -4.157000000 | -1.696288000 |
| C | -0.190270000 | 1.049535000  | 3.868160000  |
| H | -0.168212000 | 0.209065000  | 4.573423000  |
| H | -0.473068000 | 1.957224000  | 4.419150000  |
| C | 2.269144000  | -1.038518000 | 3.175673000  |
| H | 1.568608000  | -1.622189000 | 3.775985000  |
| H | 3.028660000  | -0.583964000 | 3.827123000  |
| C | -6.821216000 | 2.649435000  | 1.243689000  |
| H | -6.599261000 | 3.344733000  | 2.064199000  |
| C | -2.278346000 | 0.397845000  | -3.699543000 |
| H | -2.041928000 | -0.415748000 | -4.398460000 |
| H | -2.353417000 | 1.325146000  | -4.283976000 |
| C | 2.924538000  | -1.876959000 | 2.056931000  |
| H | 3.933382000  | -2.204642000 | 2.312105000  |
| H | 2.321215000  | -2.753670000 | 1.813333000  |
| C | -8.076902000 | 1.849525000  | 1.637204000  |
| H | -8.362658000 | 1.146603000  | 0.844579000  |
| H | -8.926203000 | 2.521629000  | 1.803475000  |
| H | -7.909976000 | 1.273321000  | 2.553627000  |
| C | -7.075125000 | 3.488130000  | -0.023009000 |
| H | -7.313872000 | 2.845217000  | -0.879671000 |
| H | -6.195955000 | 4.086081000  | -0.286454000 |
| H | -7.921335000 | 4.168079000  | 0.126292000  |
| C | 3.767531000  | 5.281275000  | -0.498175000 |
| H | 4.240409000  | 4.817296000  | 0.375070000  |
| H | 2.819727000  | 5.729980000  | -0.176194000 |
| H | 4.429729000  | 6.085489000  | -0.838463000 |
| C | 4.891584000  | 3.629406000  | -2.071615000 |
| H | 5.582541000  | 4.411125000  | -2.410645000 |
| H | 4.736317000  | 2.913327000  | -2.884572000 |
| H | 5.364276000  | 3.079696000  | -1.249641000 |
